# Supplementary material
Source: PubMed Central journal article supplement (PMC2810428)

## *Supporting Information*

### **Design, Synthesis and Biological Evaluations of 2,5-Diaryl-2,3-dihydro-1,3,4-oxadiazoline Analogs of Combretastatin-A4**

Lauren Lee,<sup>†</sup> Lyda M. Robb,<sup>‡</sup> Megan Lee,<sup>†</sup> Ryan Davis,<sup>†</sup> Hilary Mackay,<sup>†</sup> Sameer Chavda,<sup>†</sup> Balaji Babu,<sup>†</sup> Erin L. O'Brien,<sup>‡</sup> April L. Risinger,<sup>‡</sup> Susan L. Mooberry,<sup>\*‡</sup> Moses Lee<sup>\*†</sup>

<sup>†</sup>*Department of Chemistry and the Division of Natural and Applied Sciences, Hope College, MI 49423*, <sup>‡</sup>*Department of Pharmacology, University of Texas Health Science Center at San Antonio, San Antonio, TX, 78229*

| Table of Contents                                                       | Pages |
|-------------------------------------------------------------------------|-------|
| 1. <sup>1</sup> H-NMR spectra of compounds <b>9a-1</b> and <b>10a-1</b> | S2-25 |
| 2. Table of elemental analysis of selected compounds                    | S26   |
| 3. HPLC tracings for selected compounds                                 | S27   |

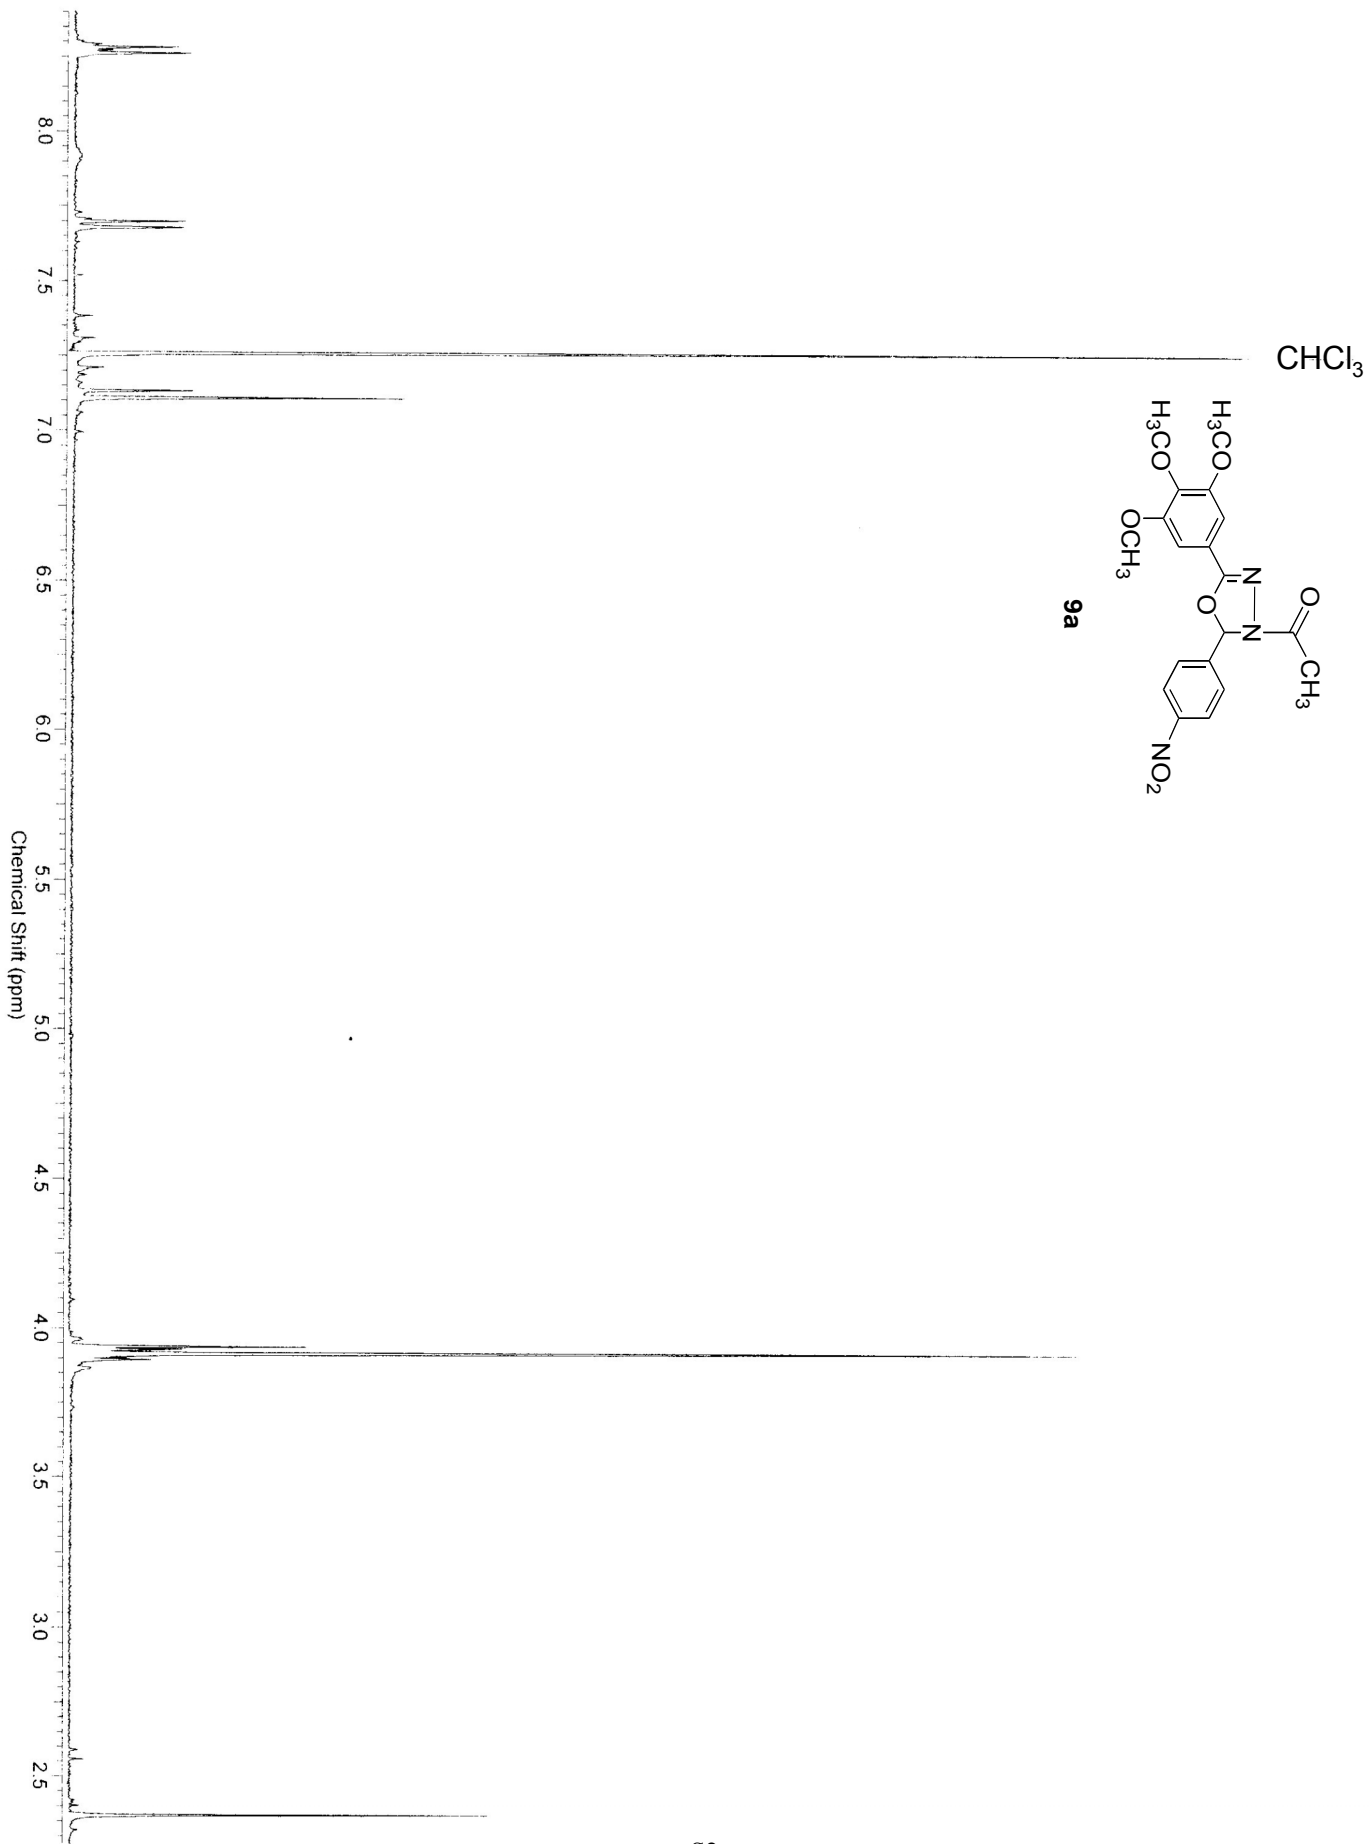

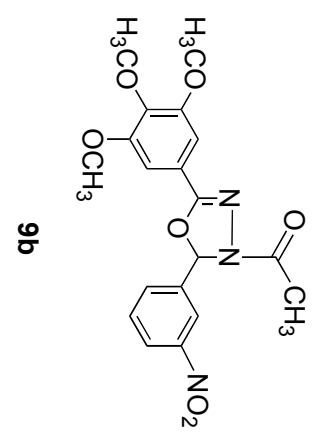

CHCl<sub>3</sub>

Acetone

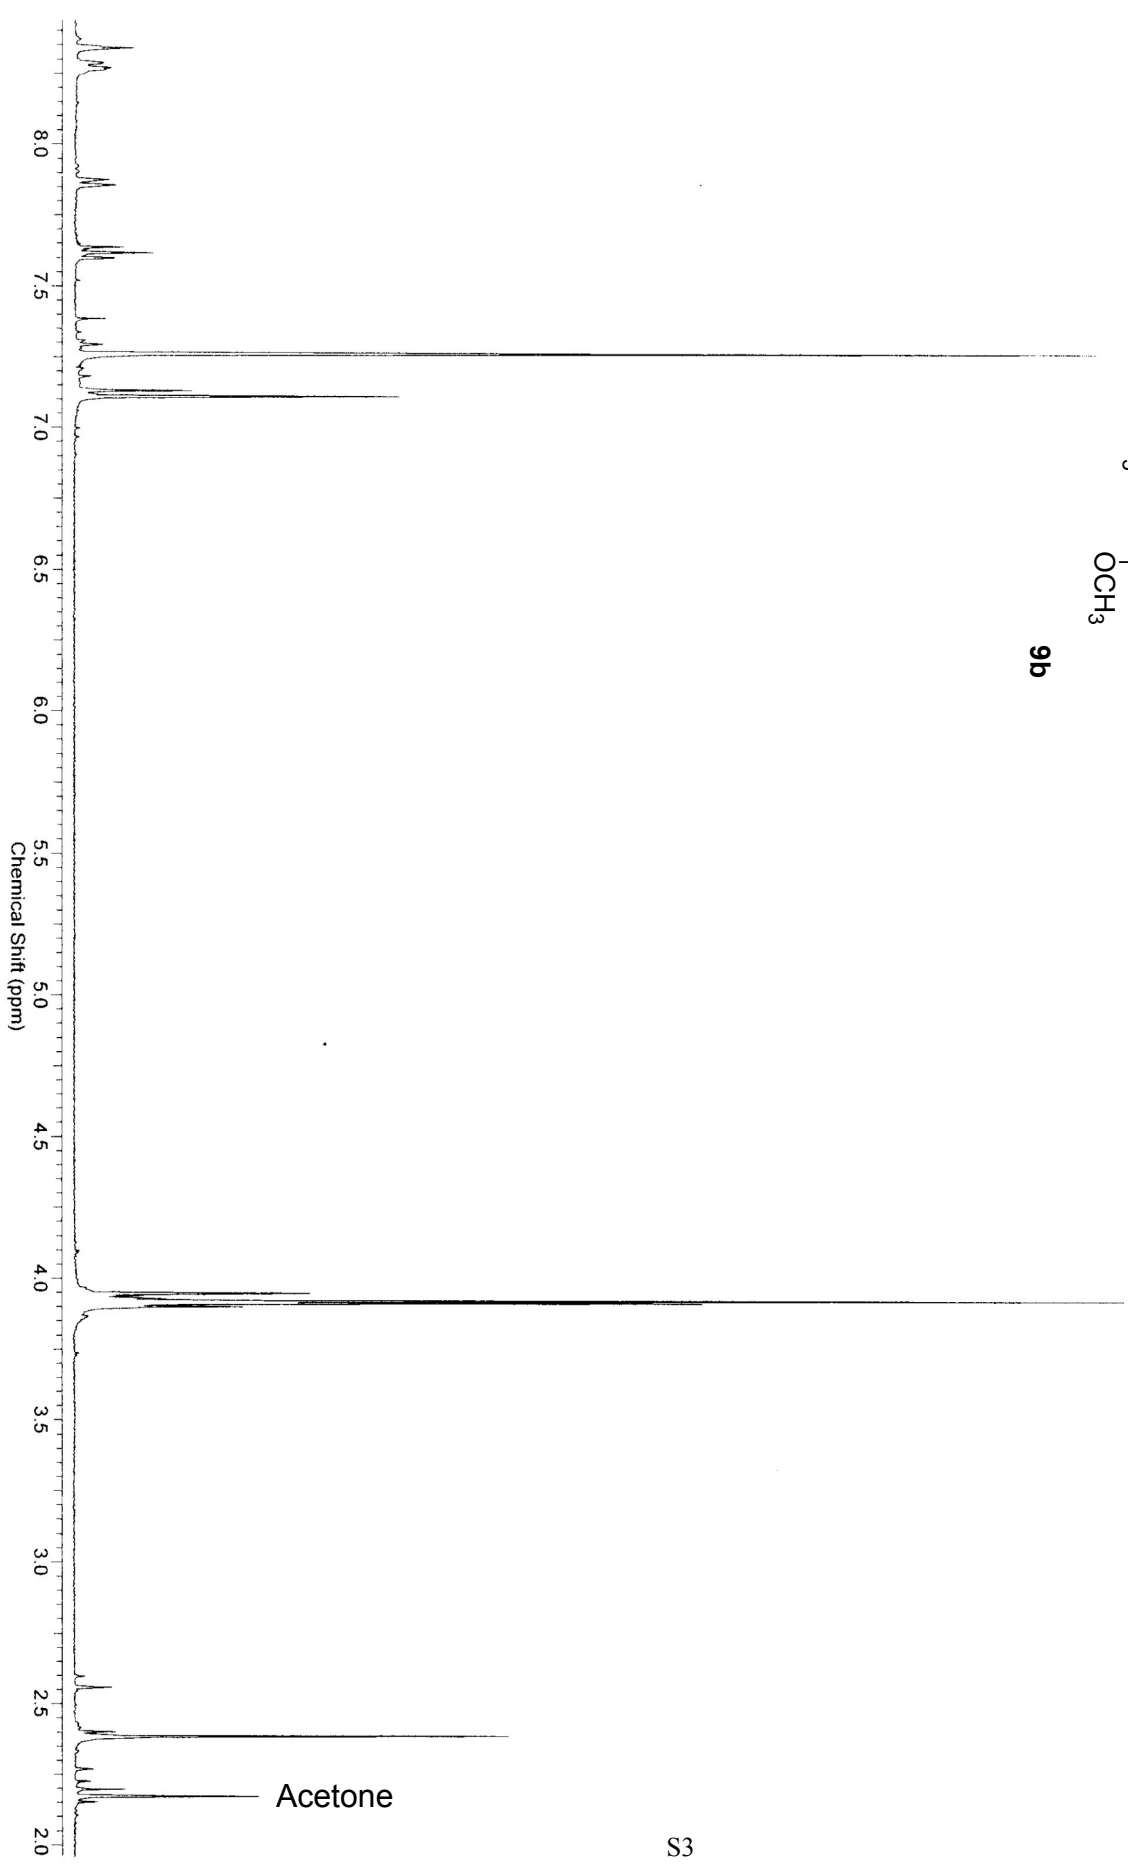

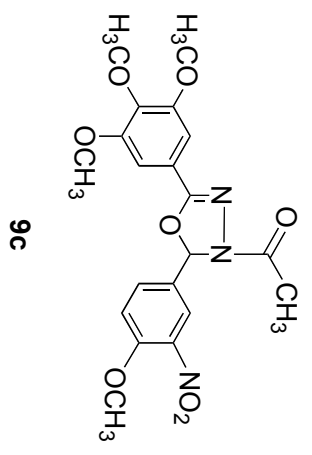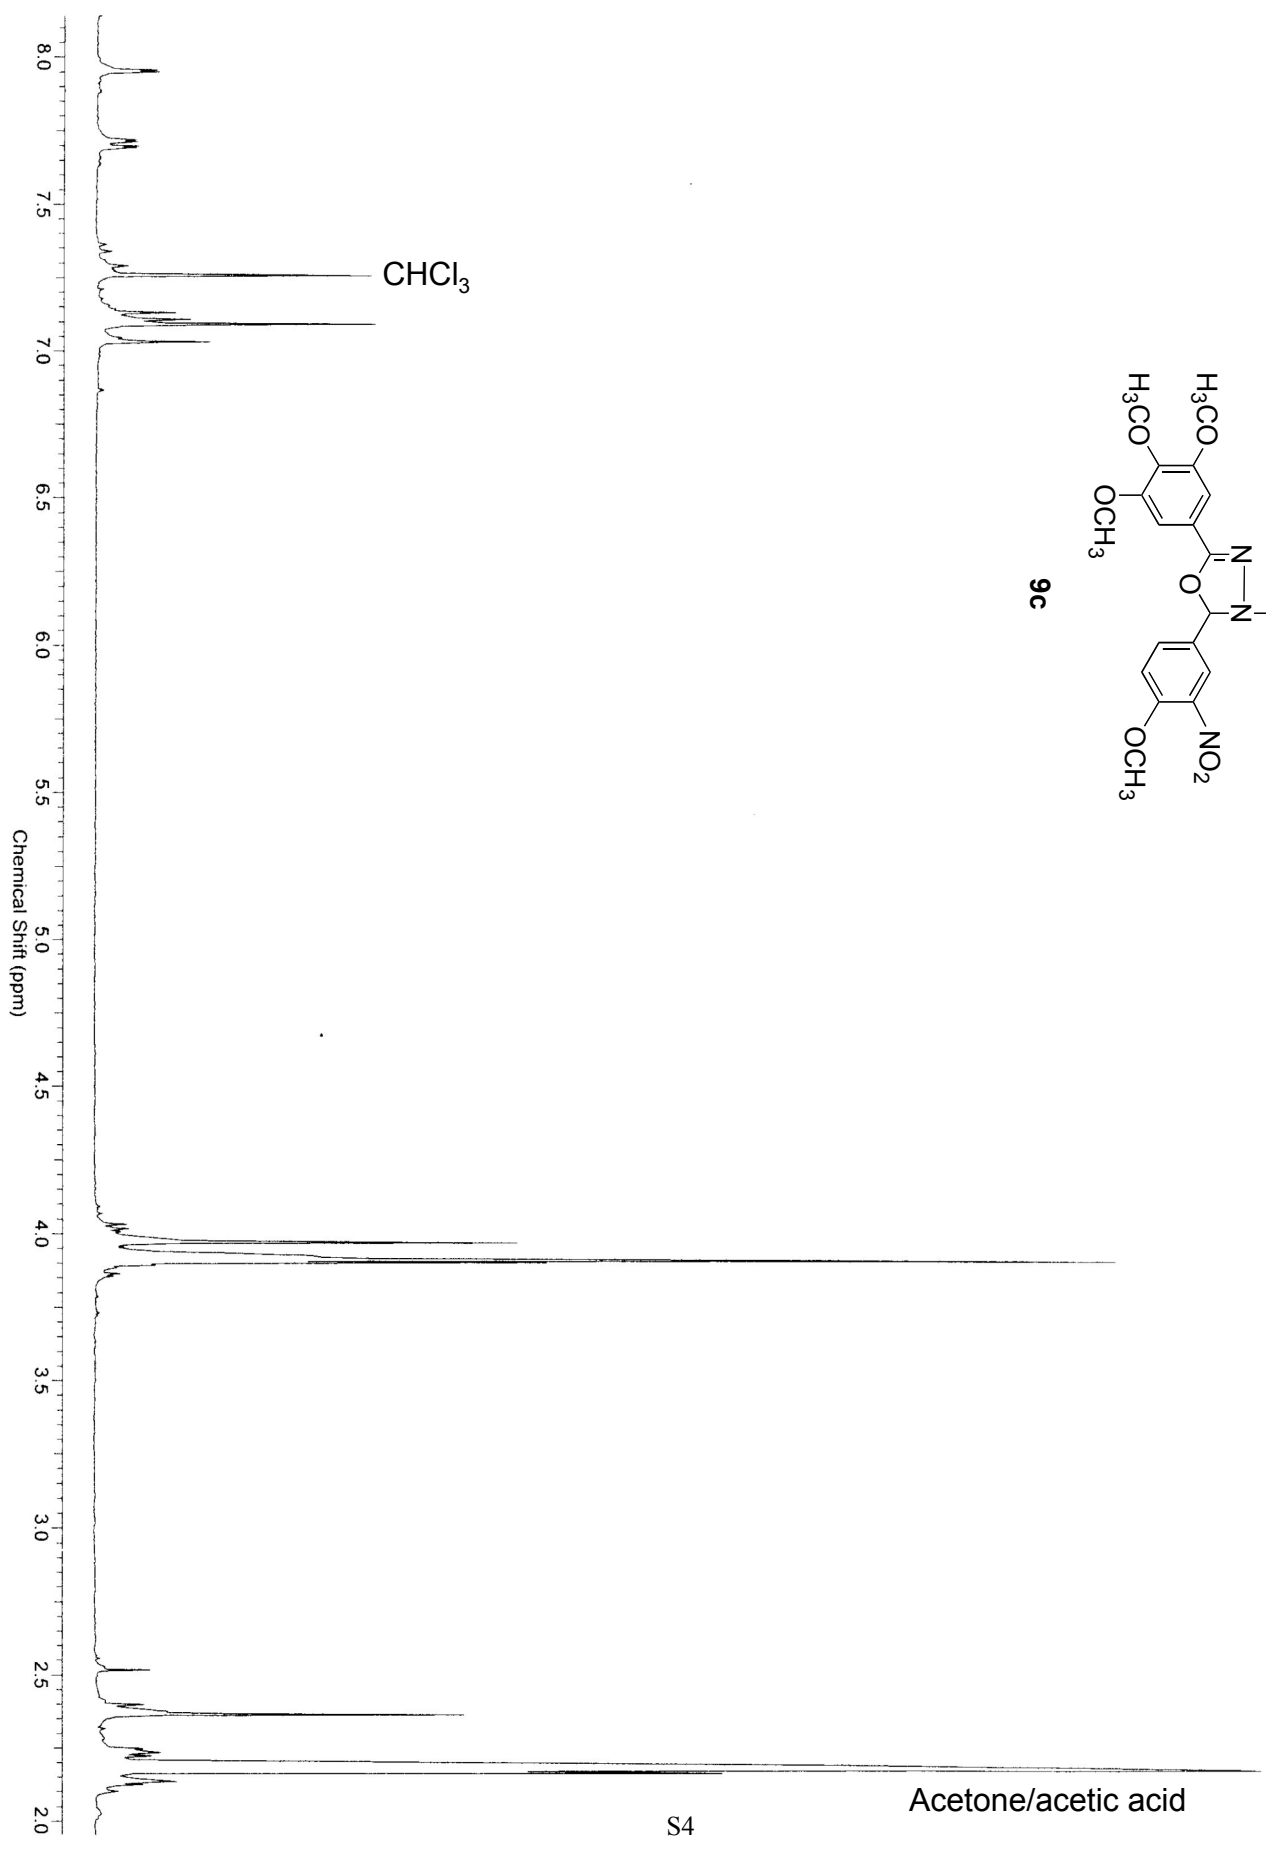

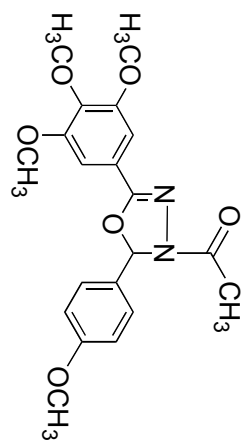

9d

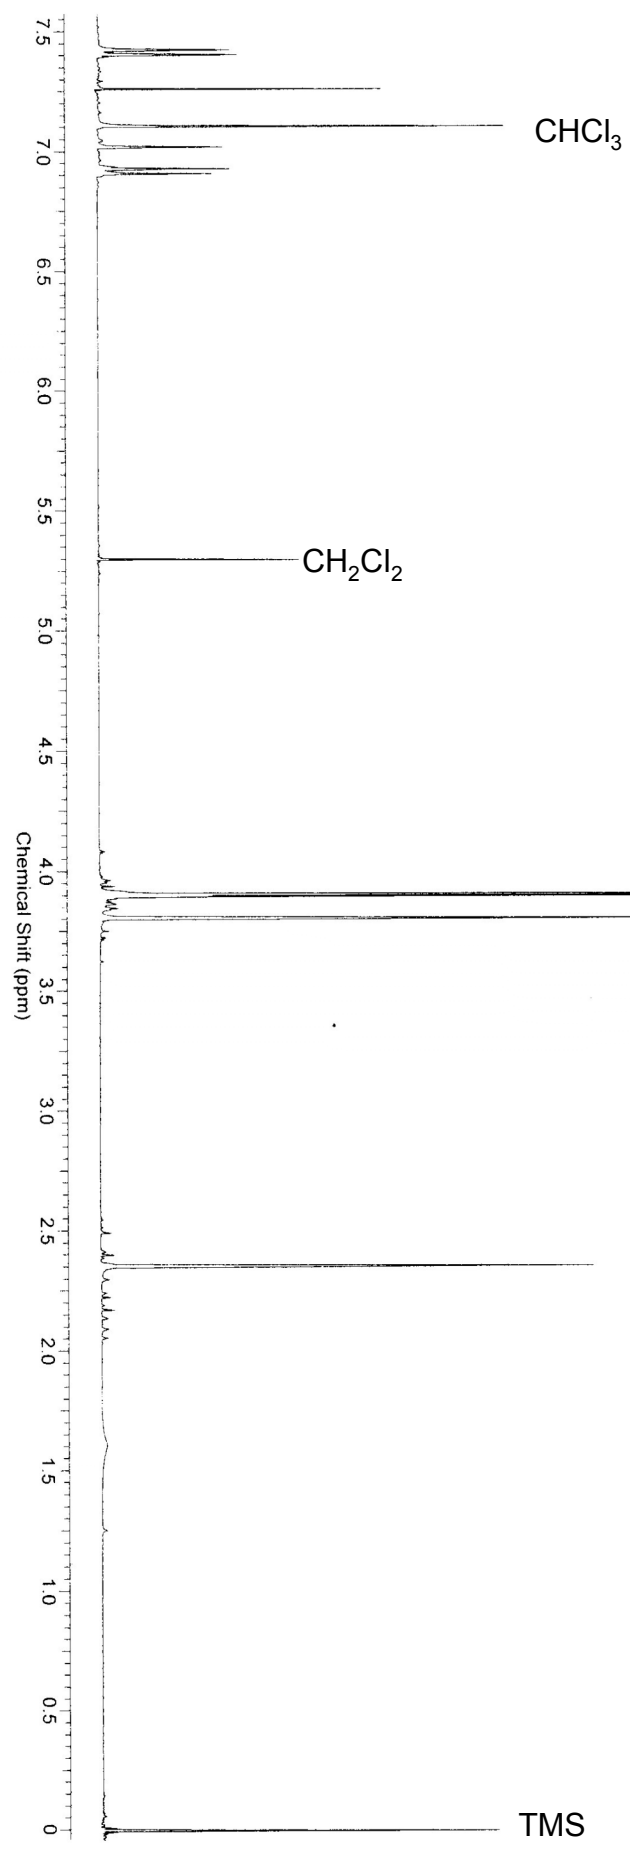

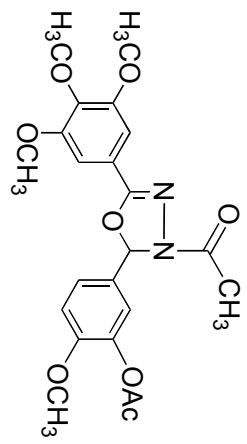

9e

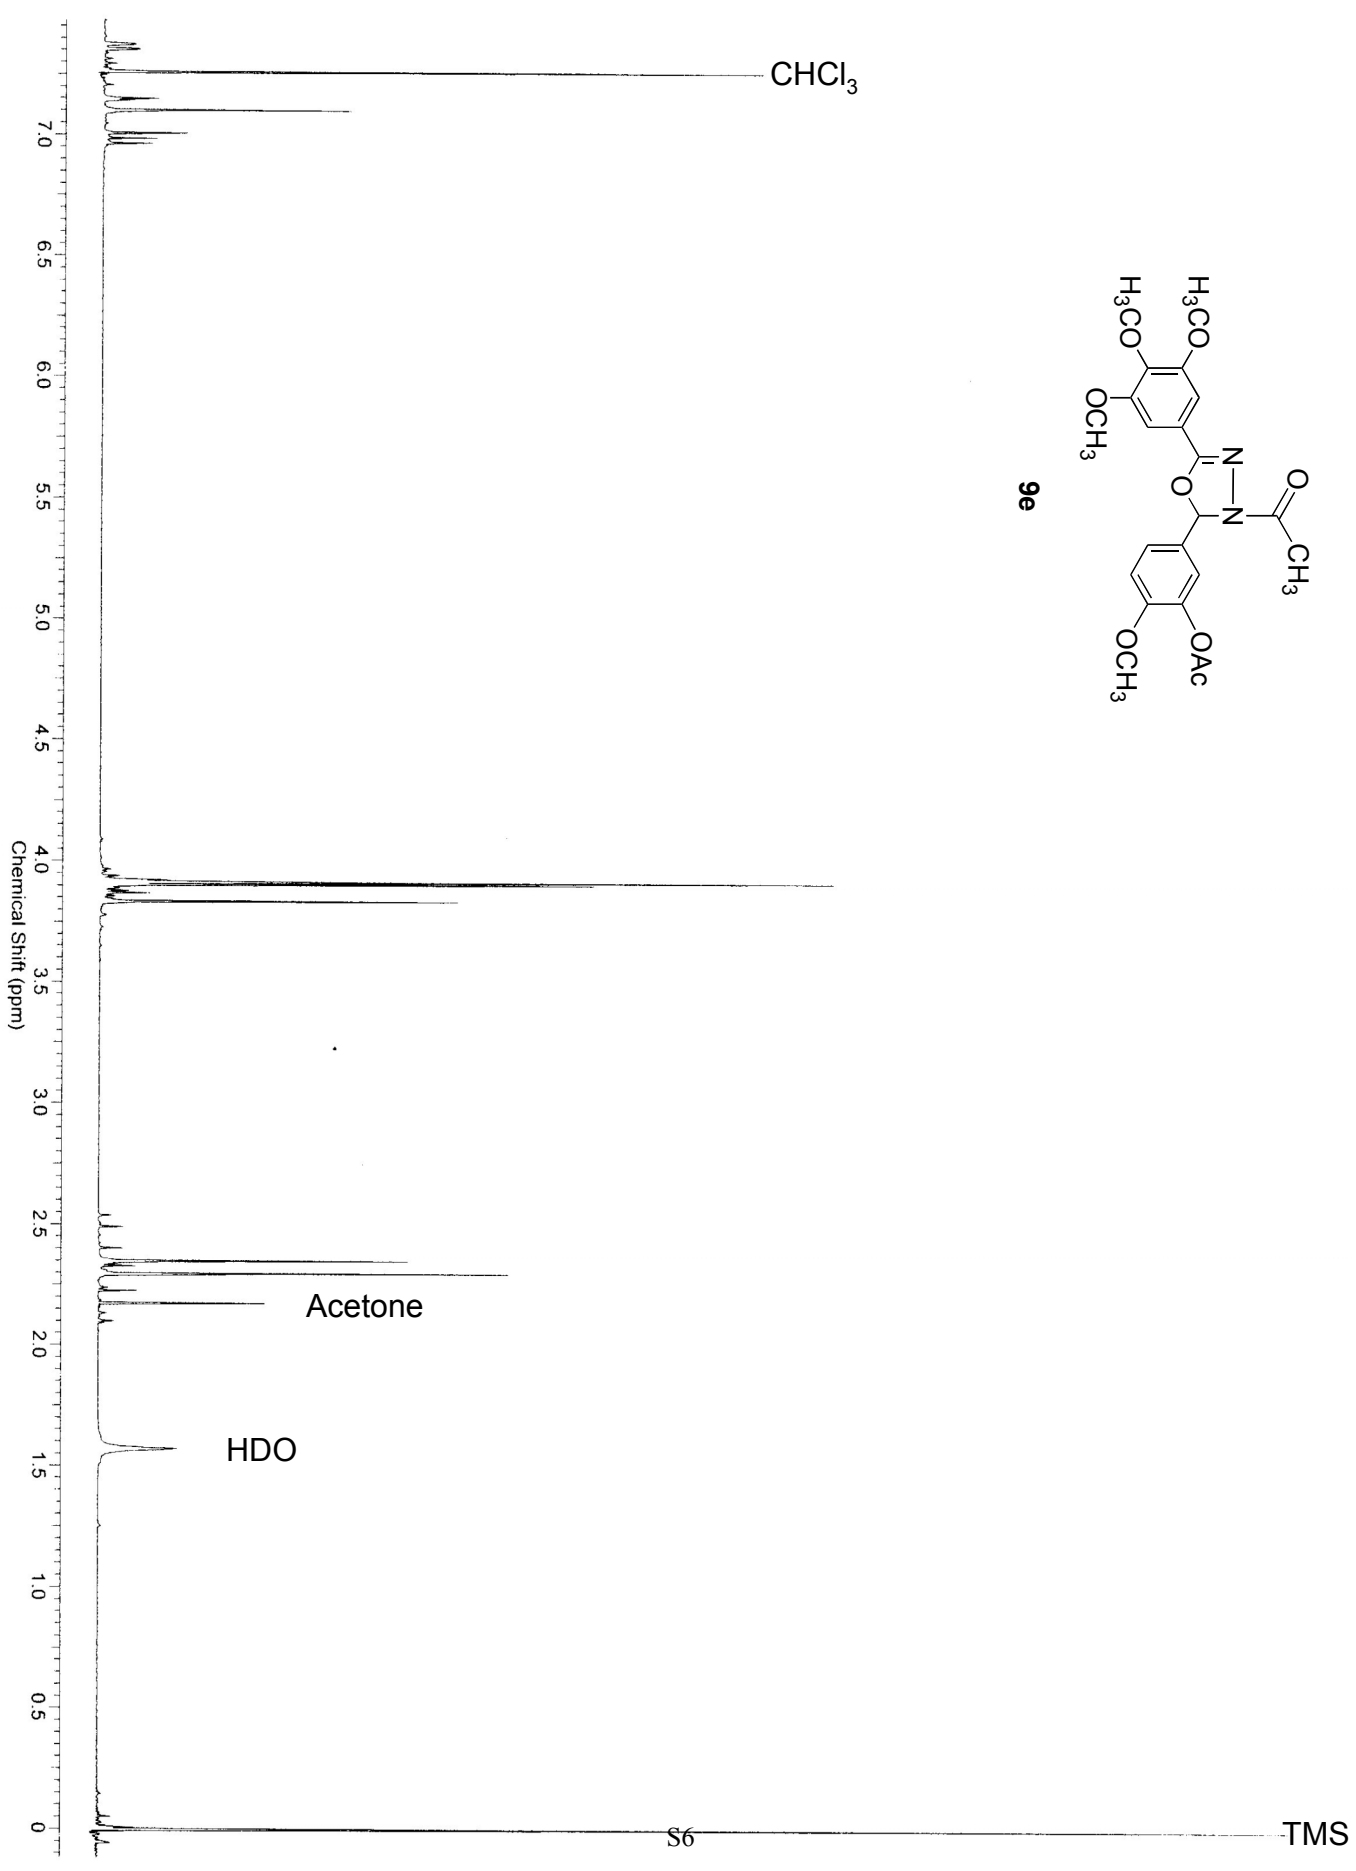

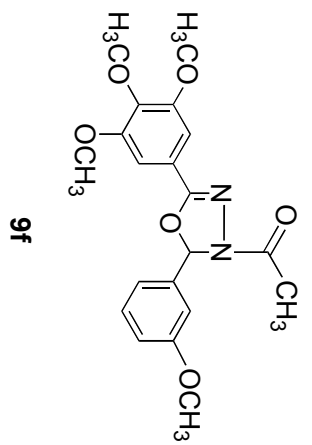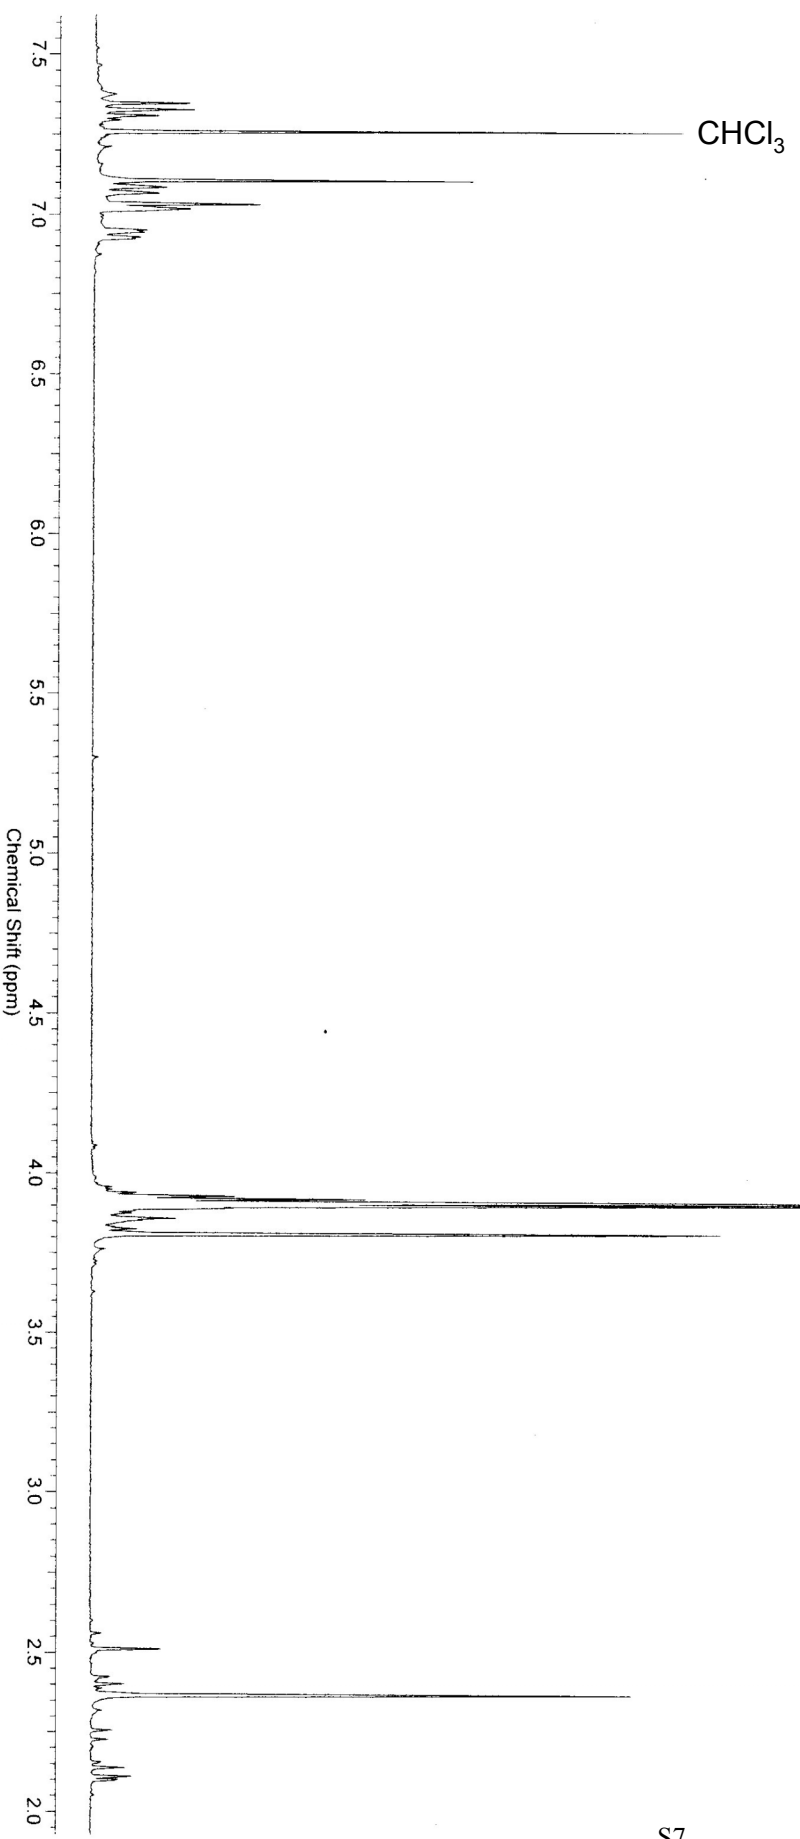

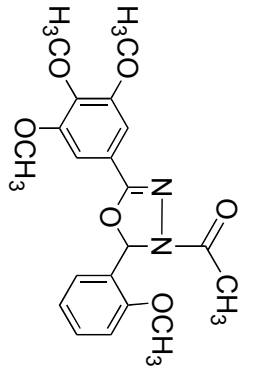

9g

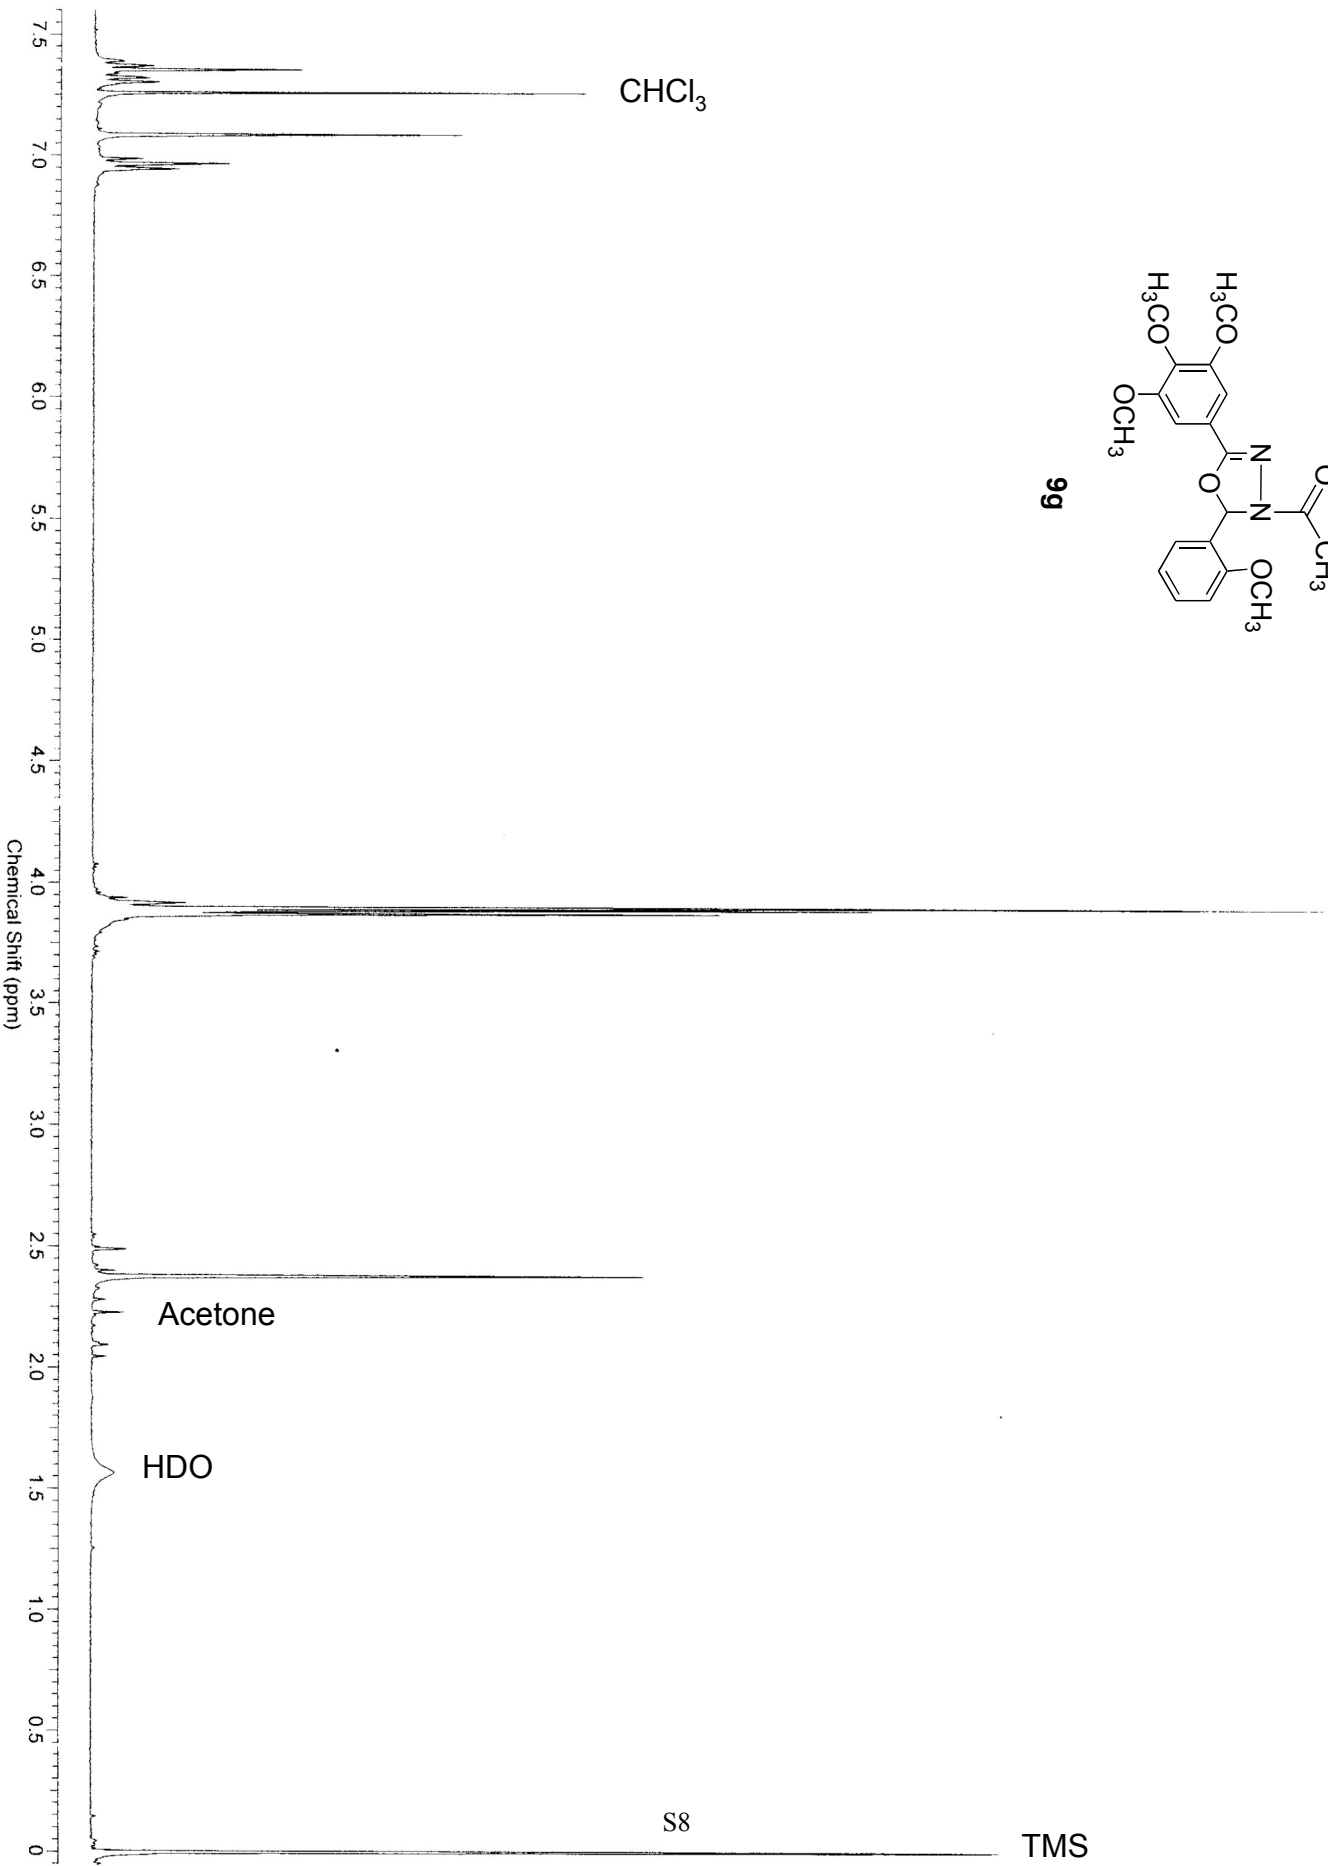

CHCl<sub>3</sub>

Acetone

HDO

S8

TMS



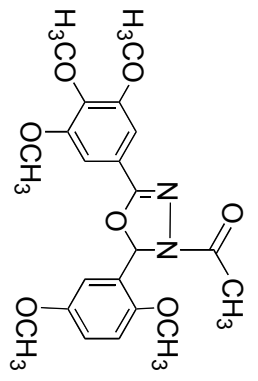

9h

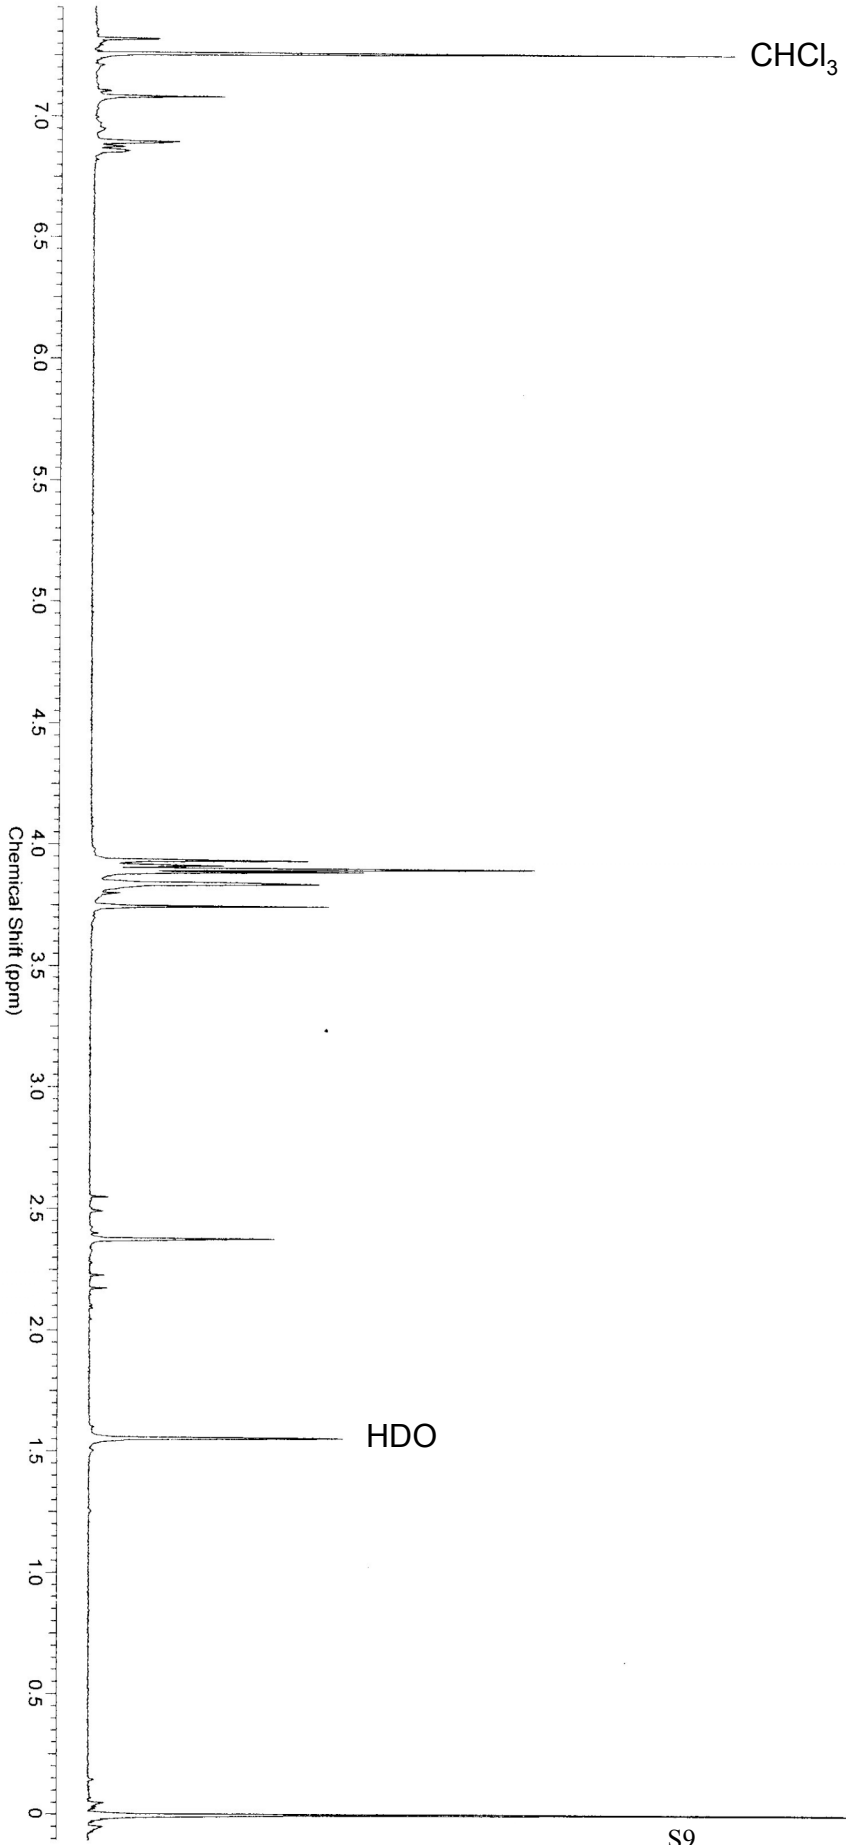

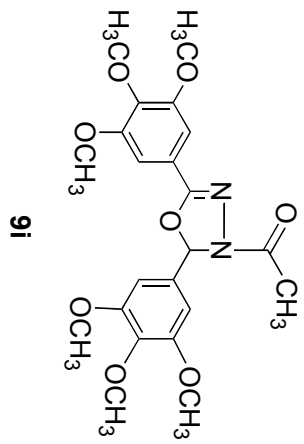

**9i**

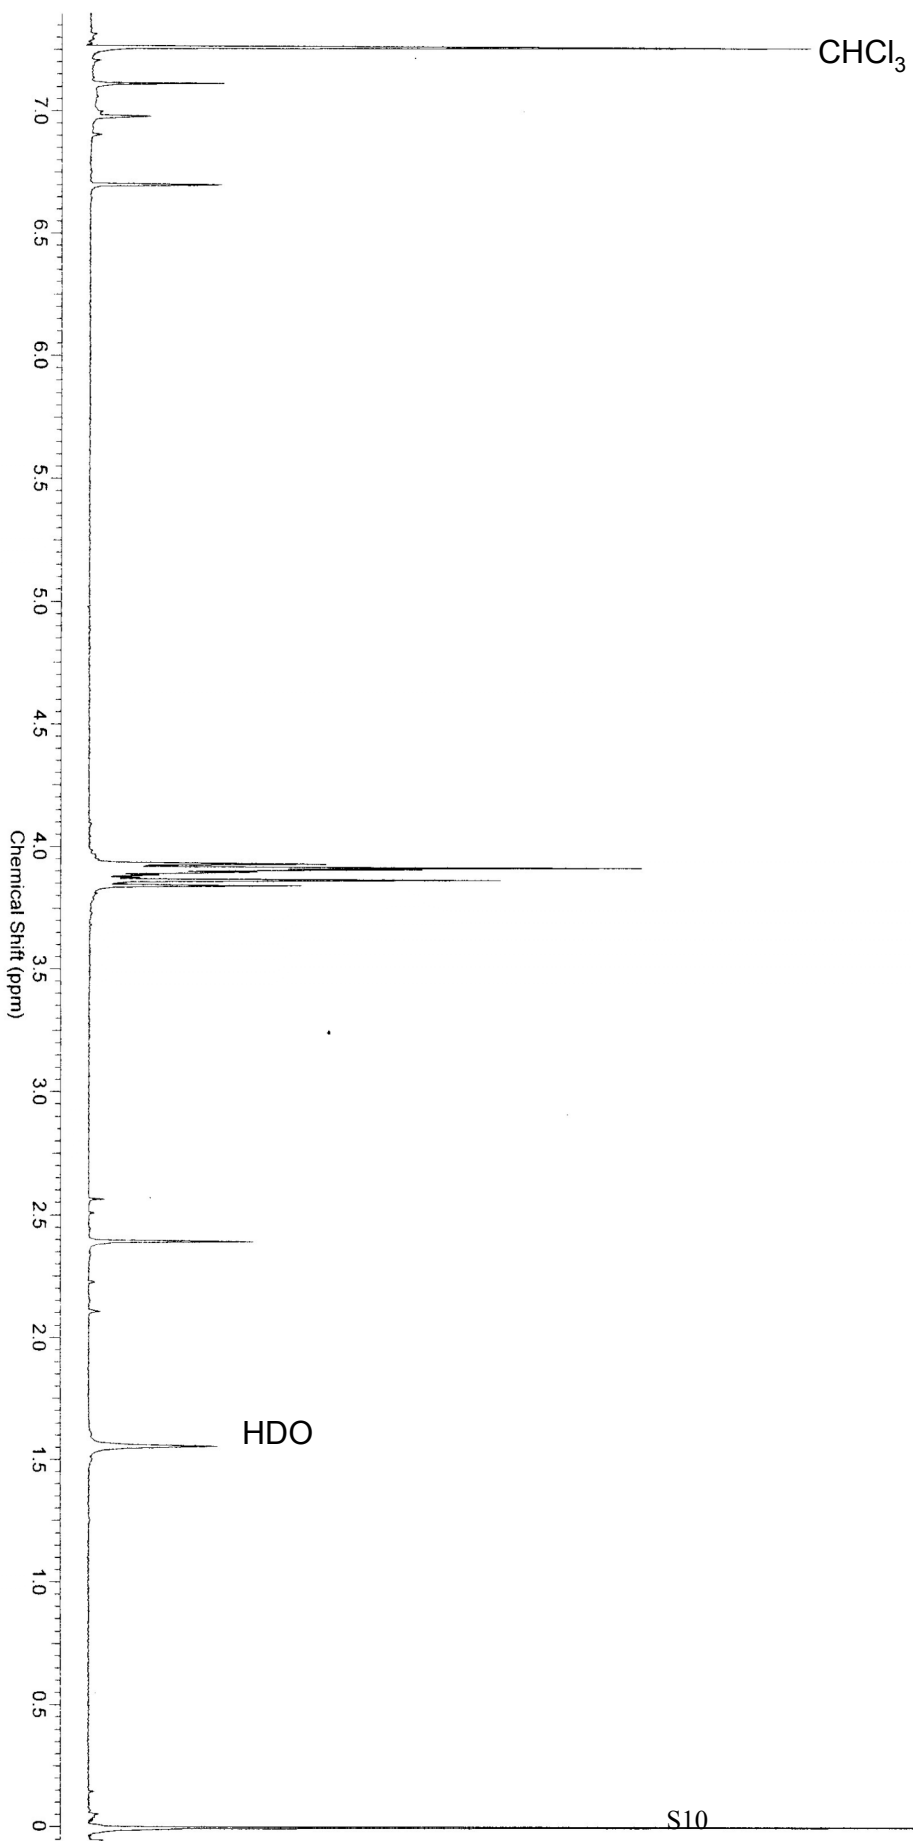

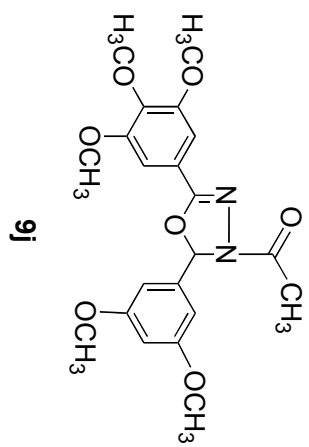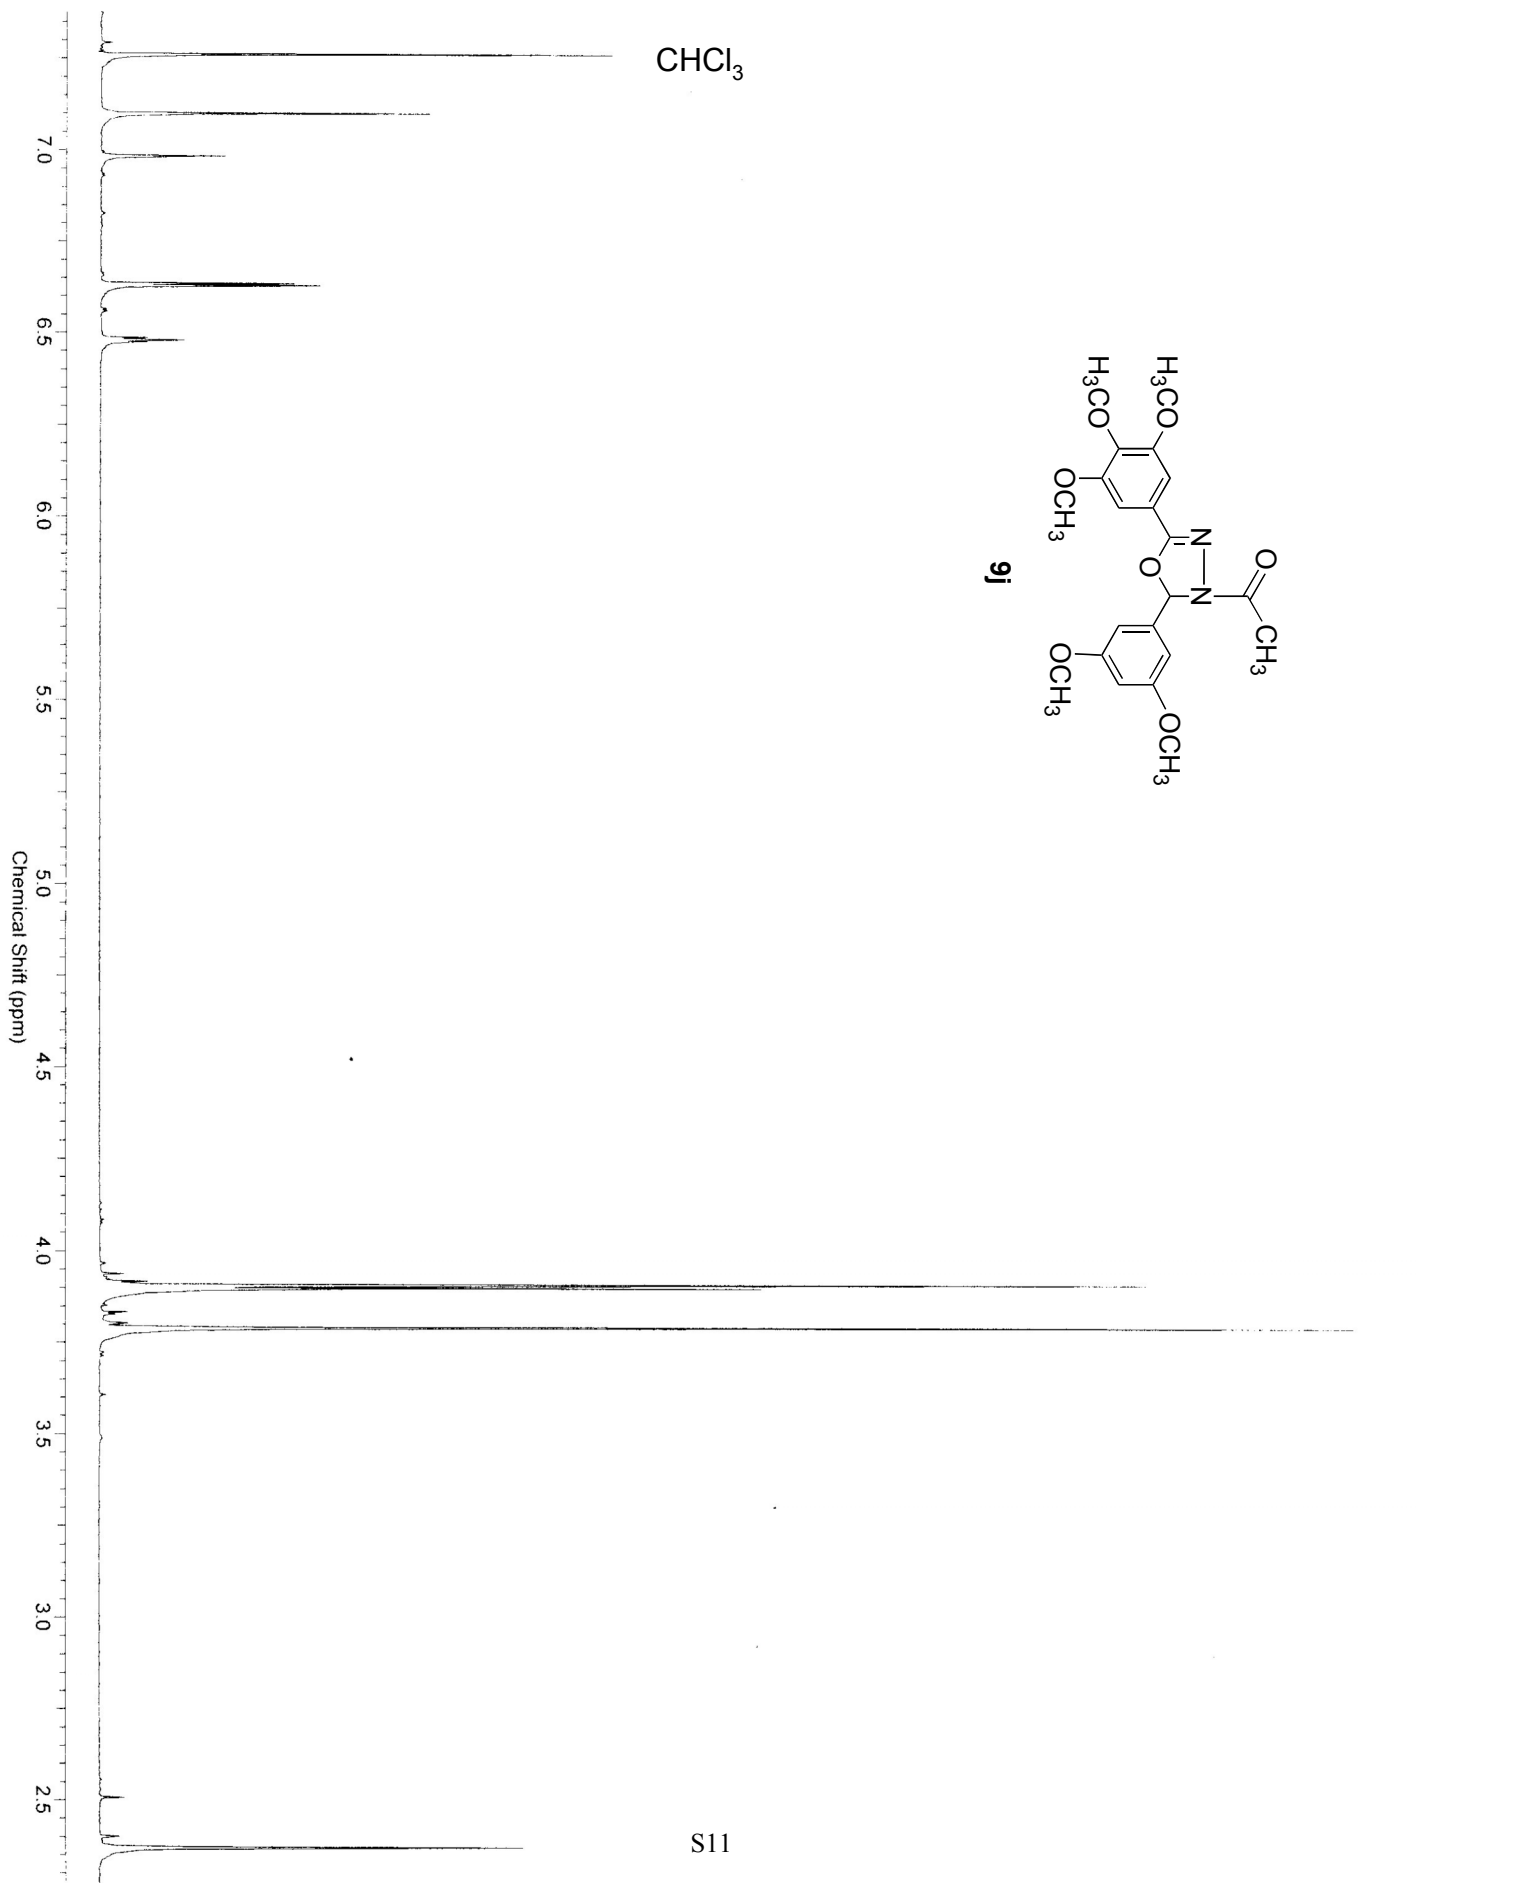

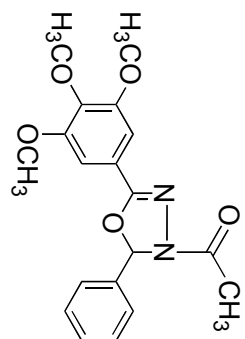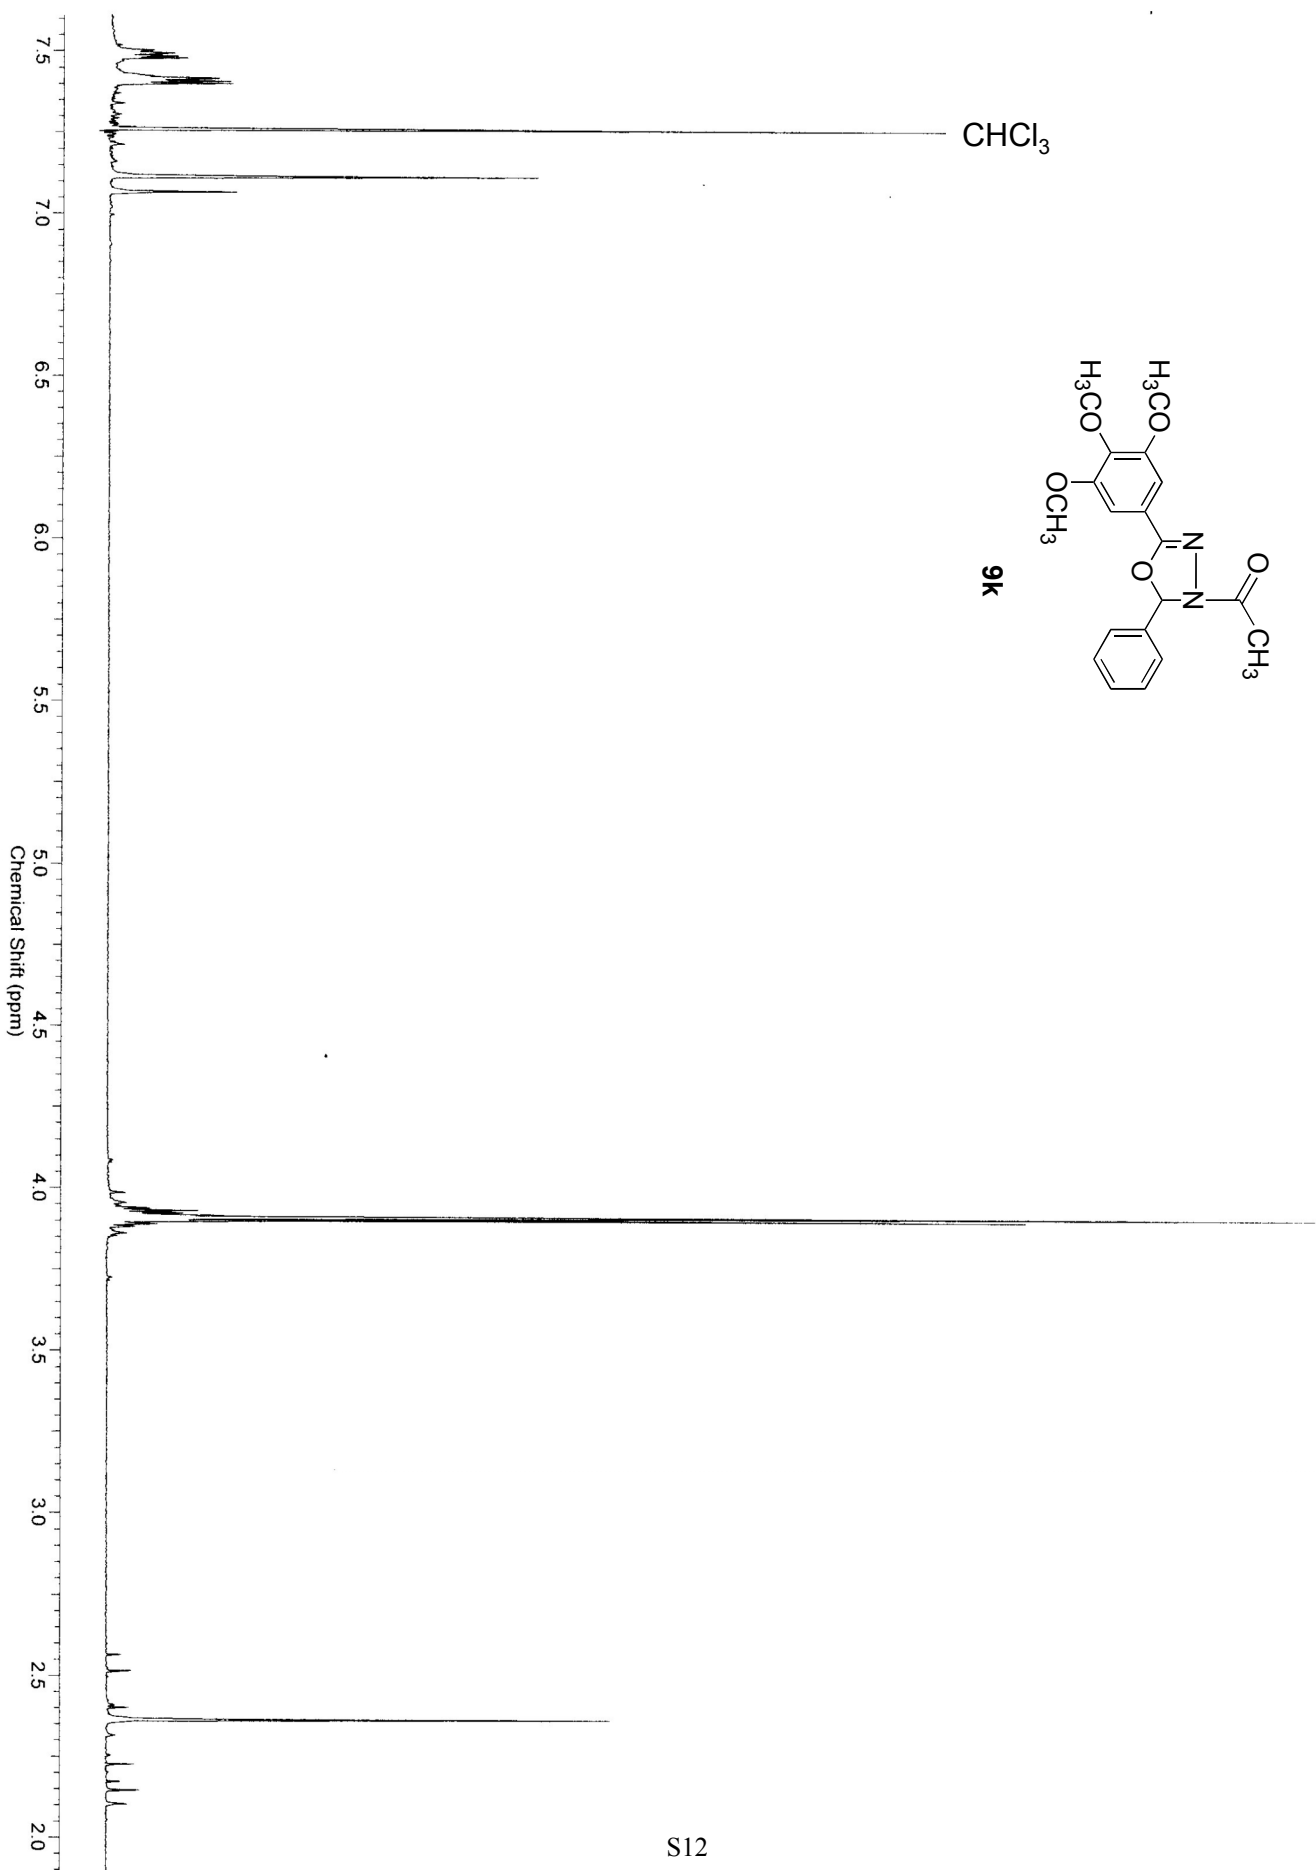

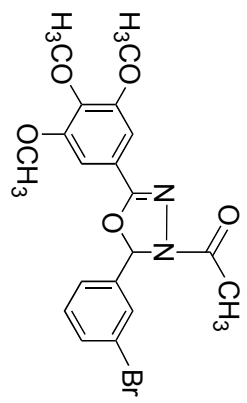

91

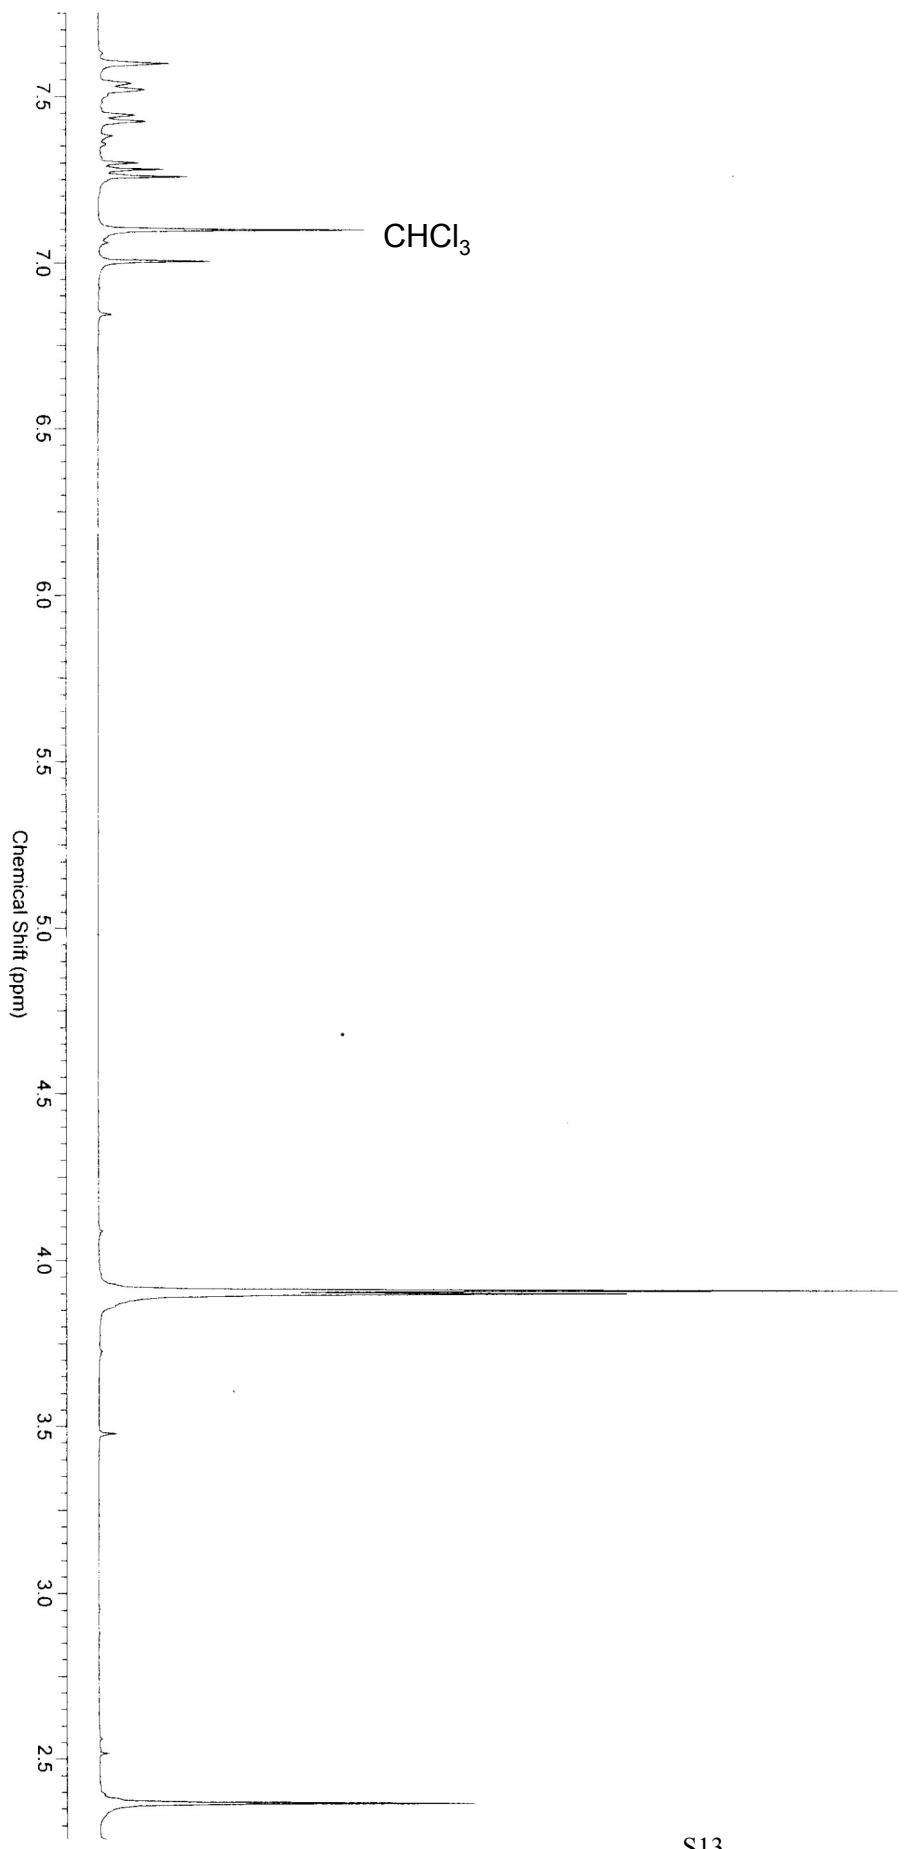

CHCl<sub>3</sub>

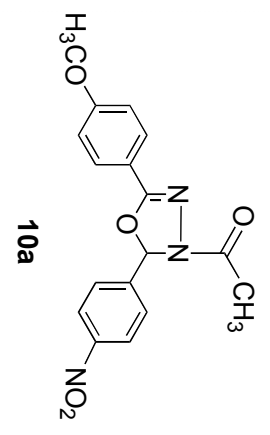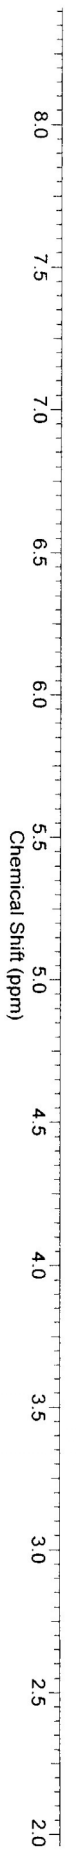

CHCl<sub>3</sub>

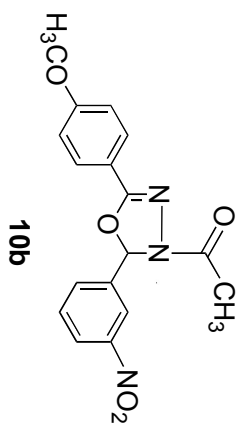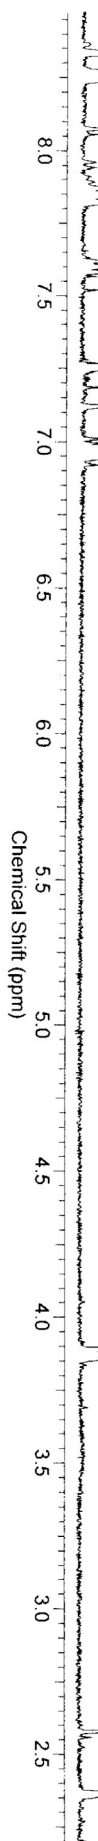

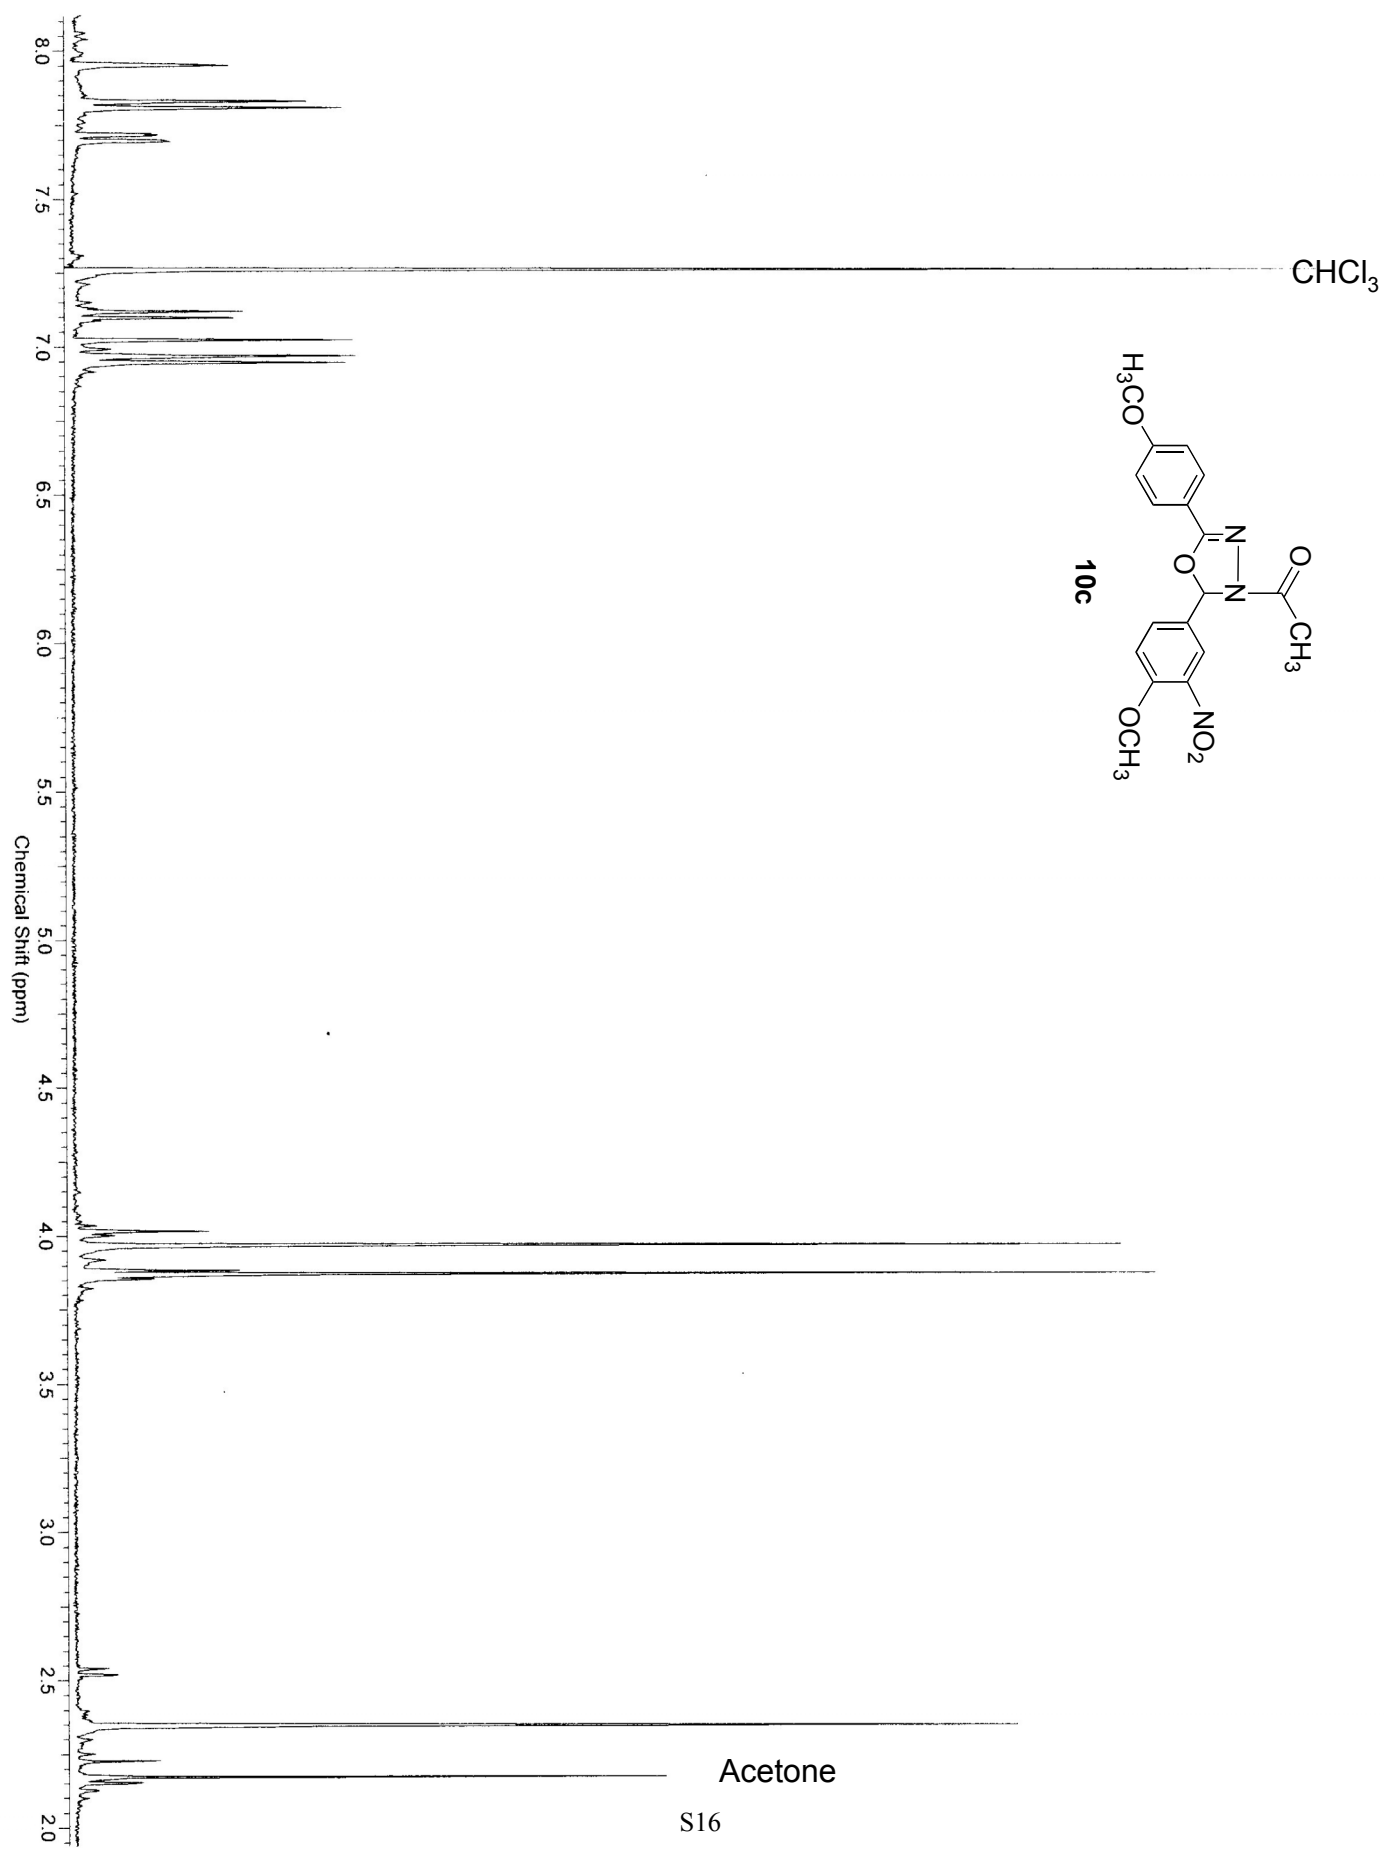



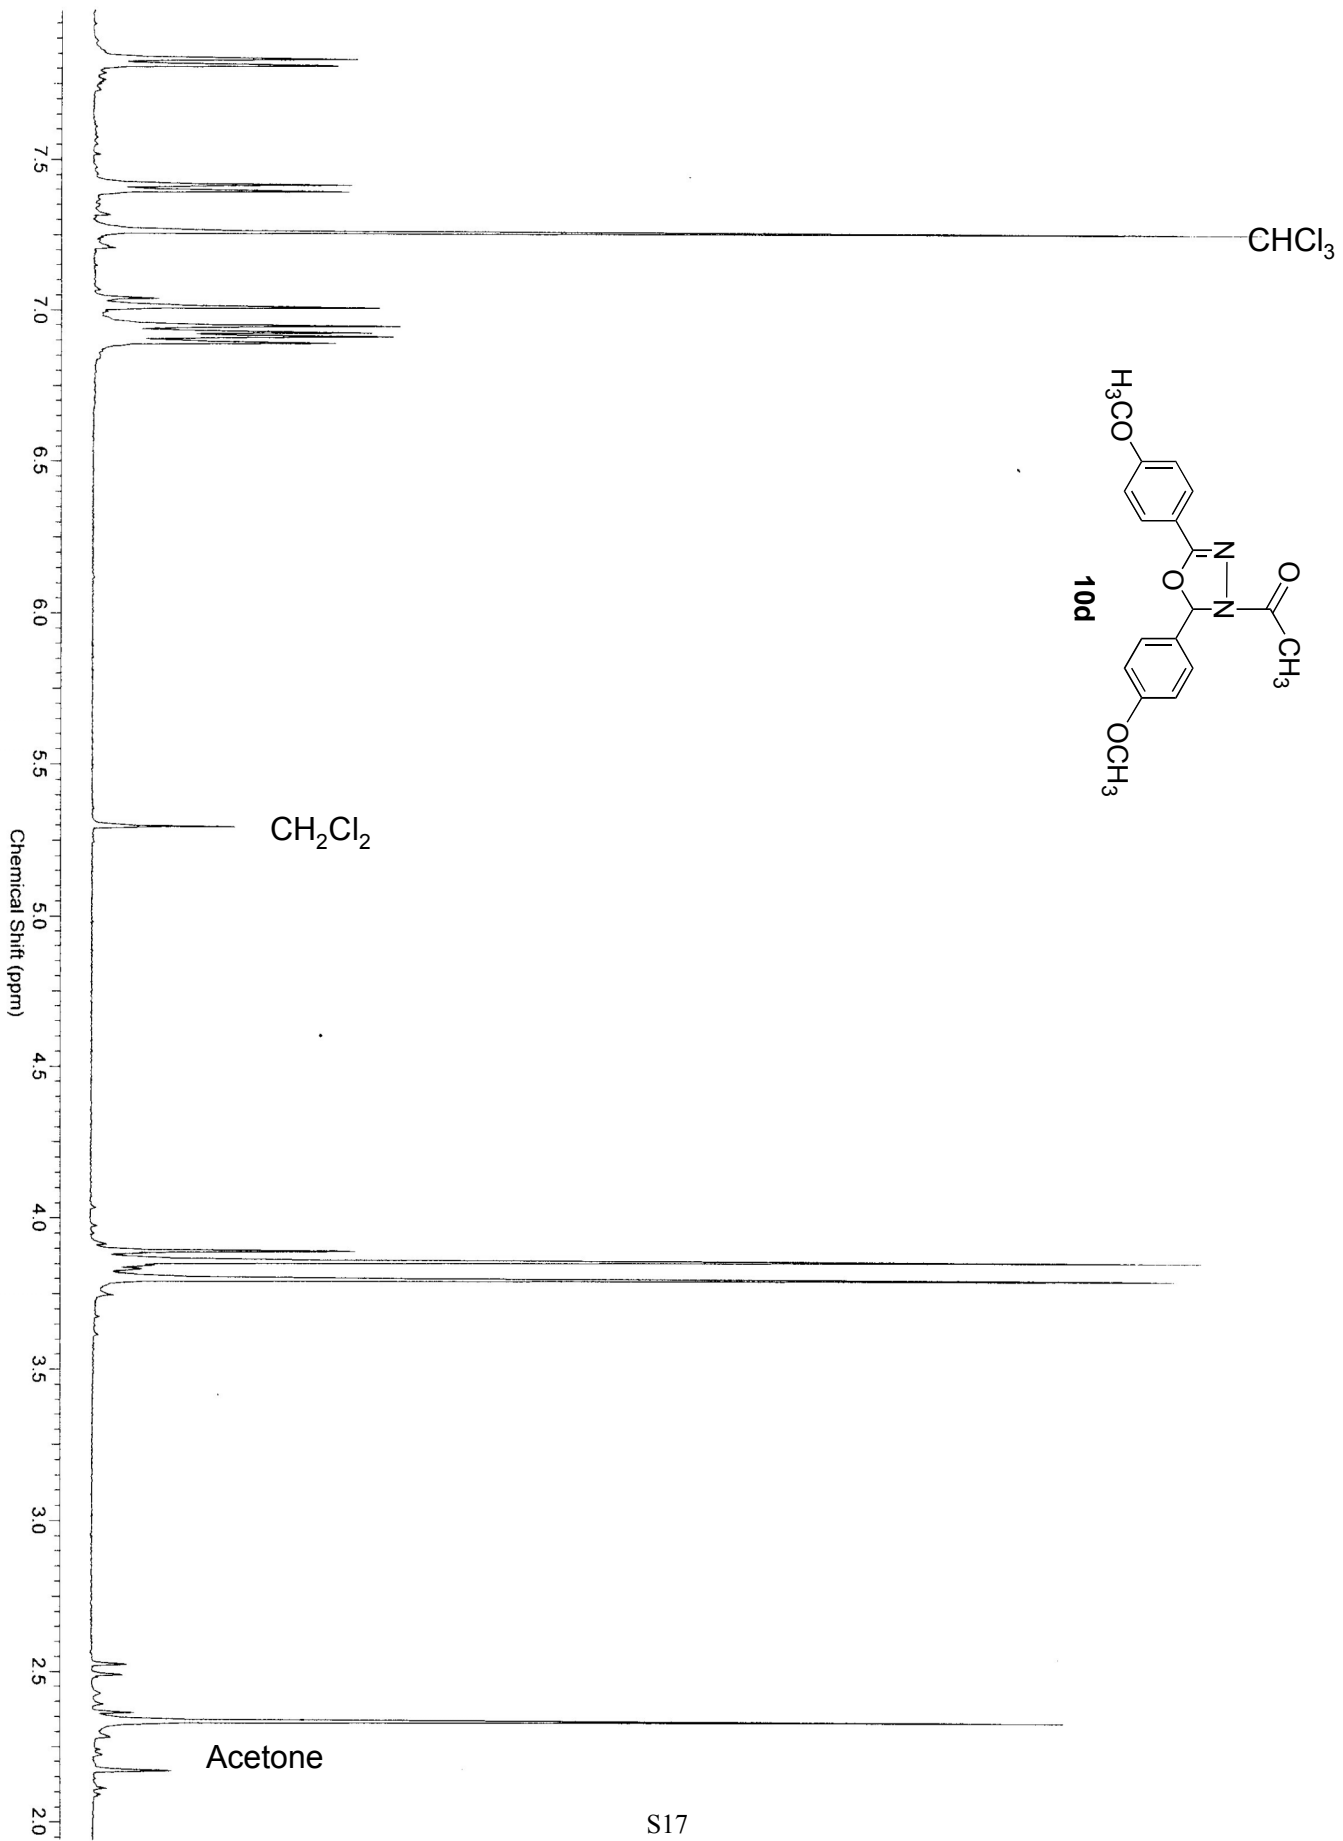

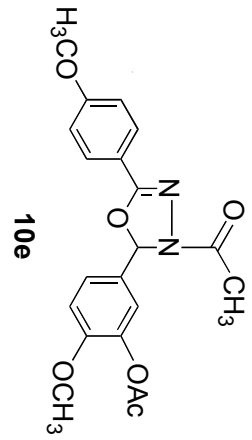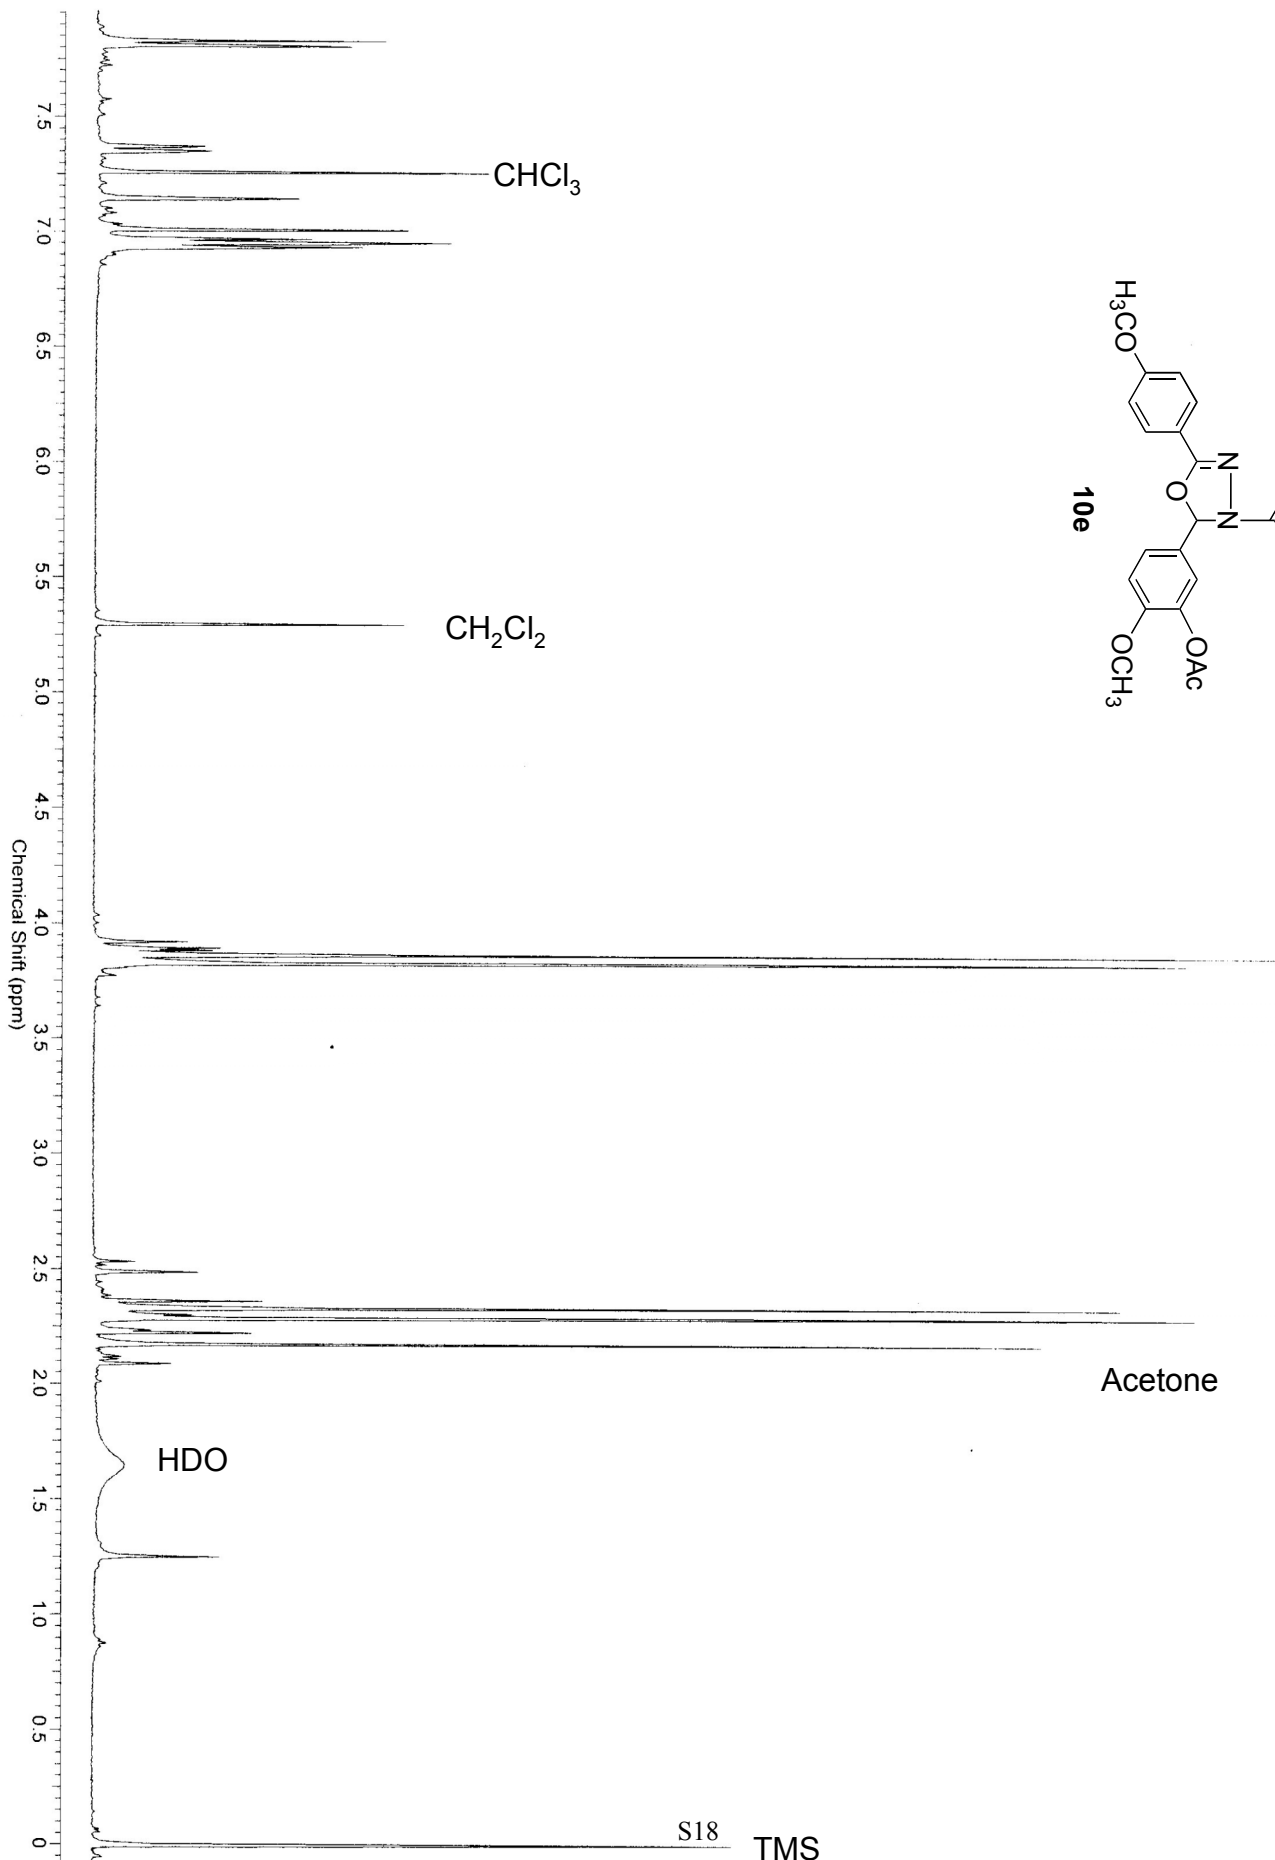

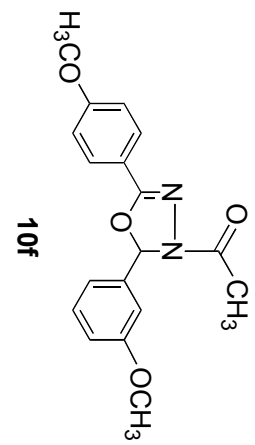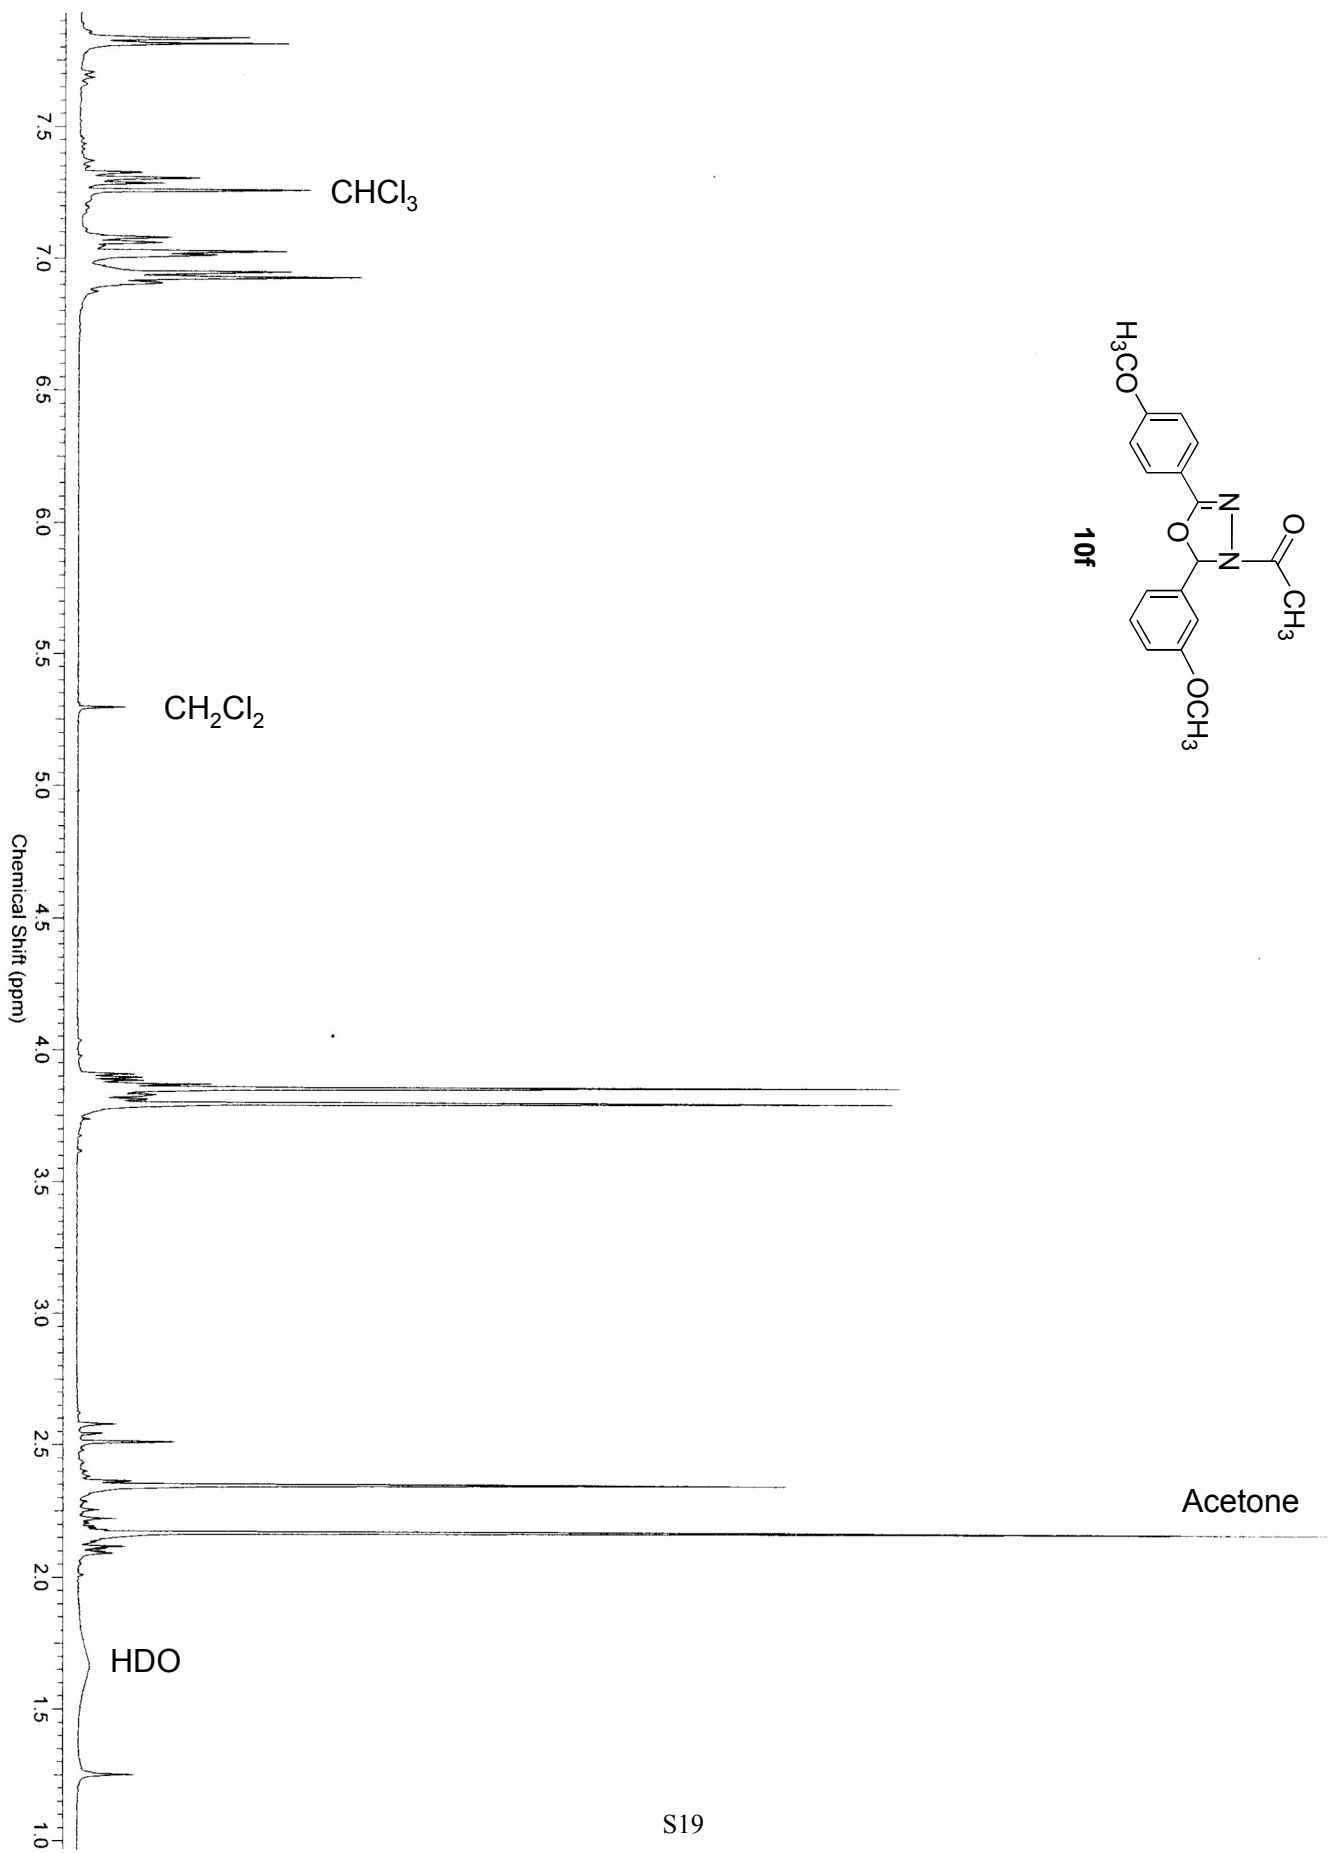

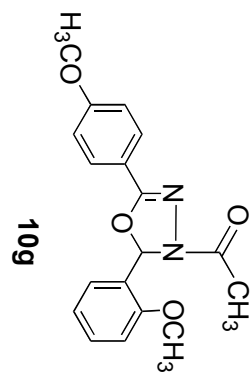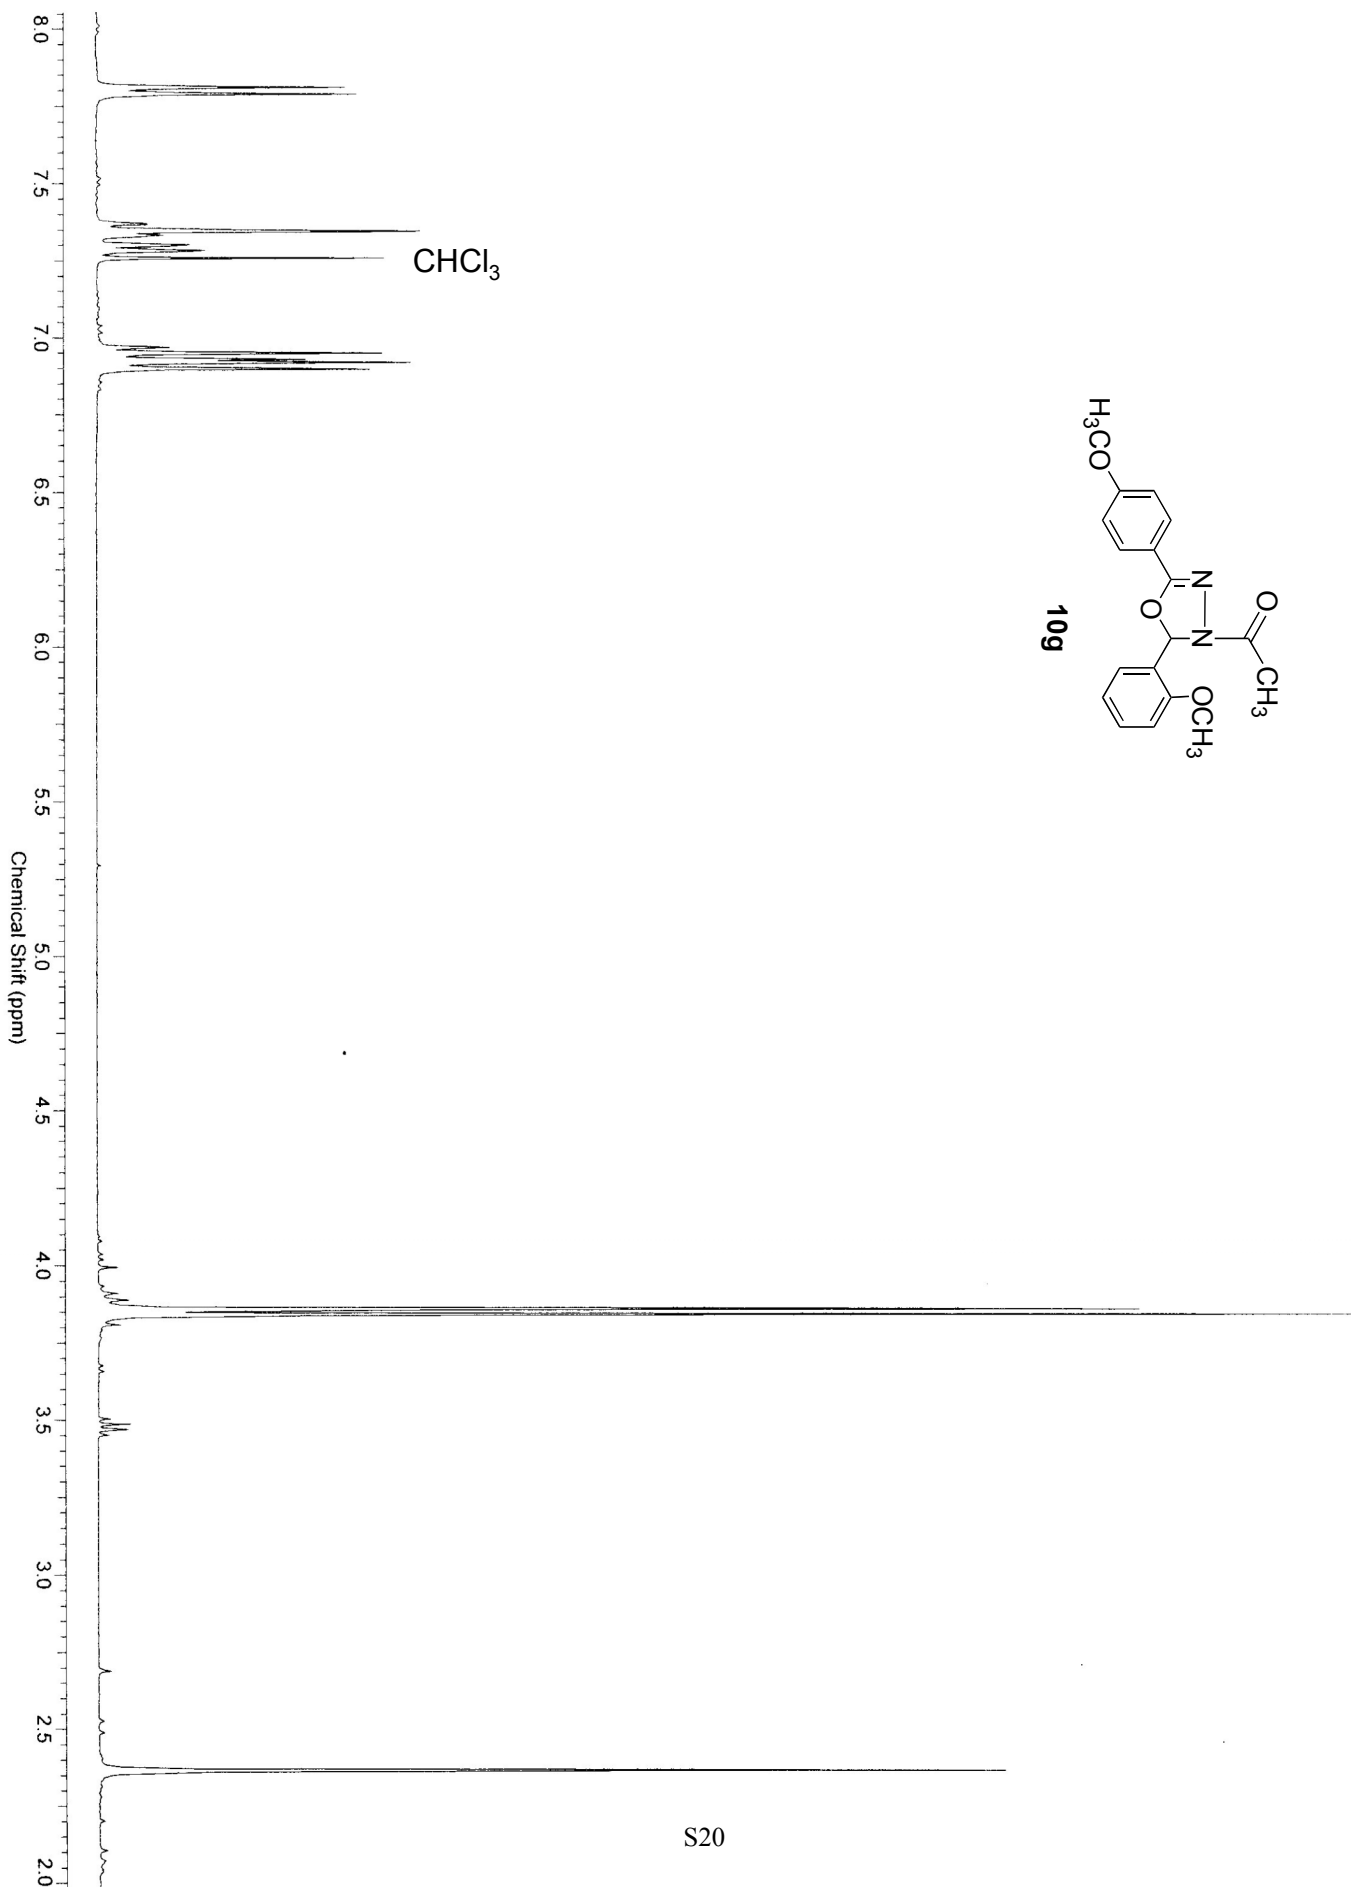

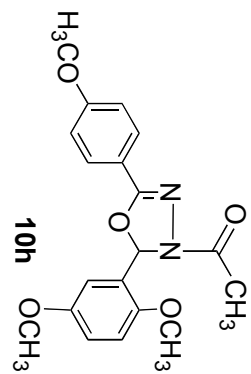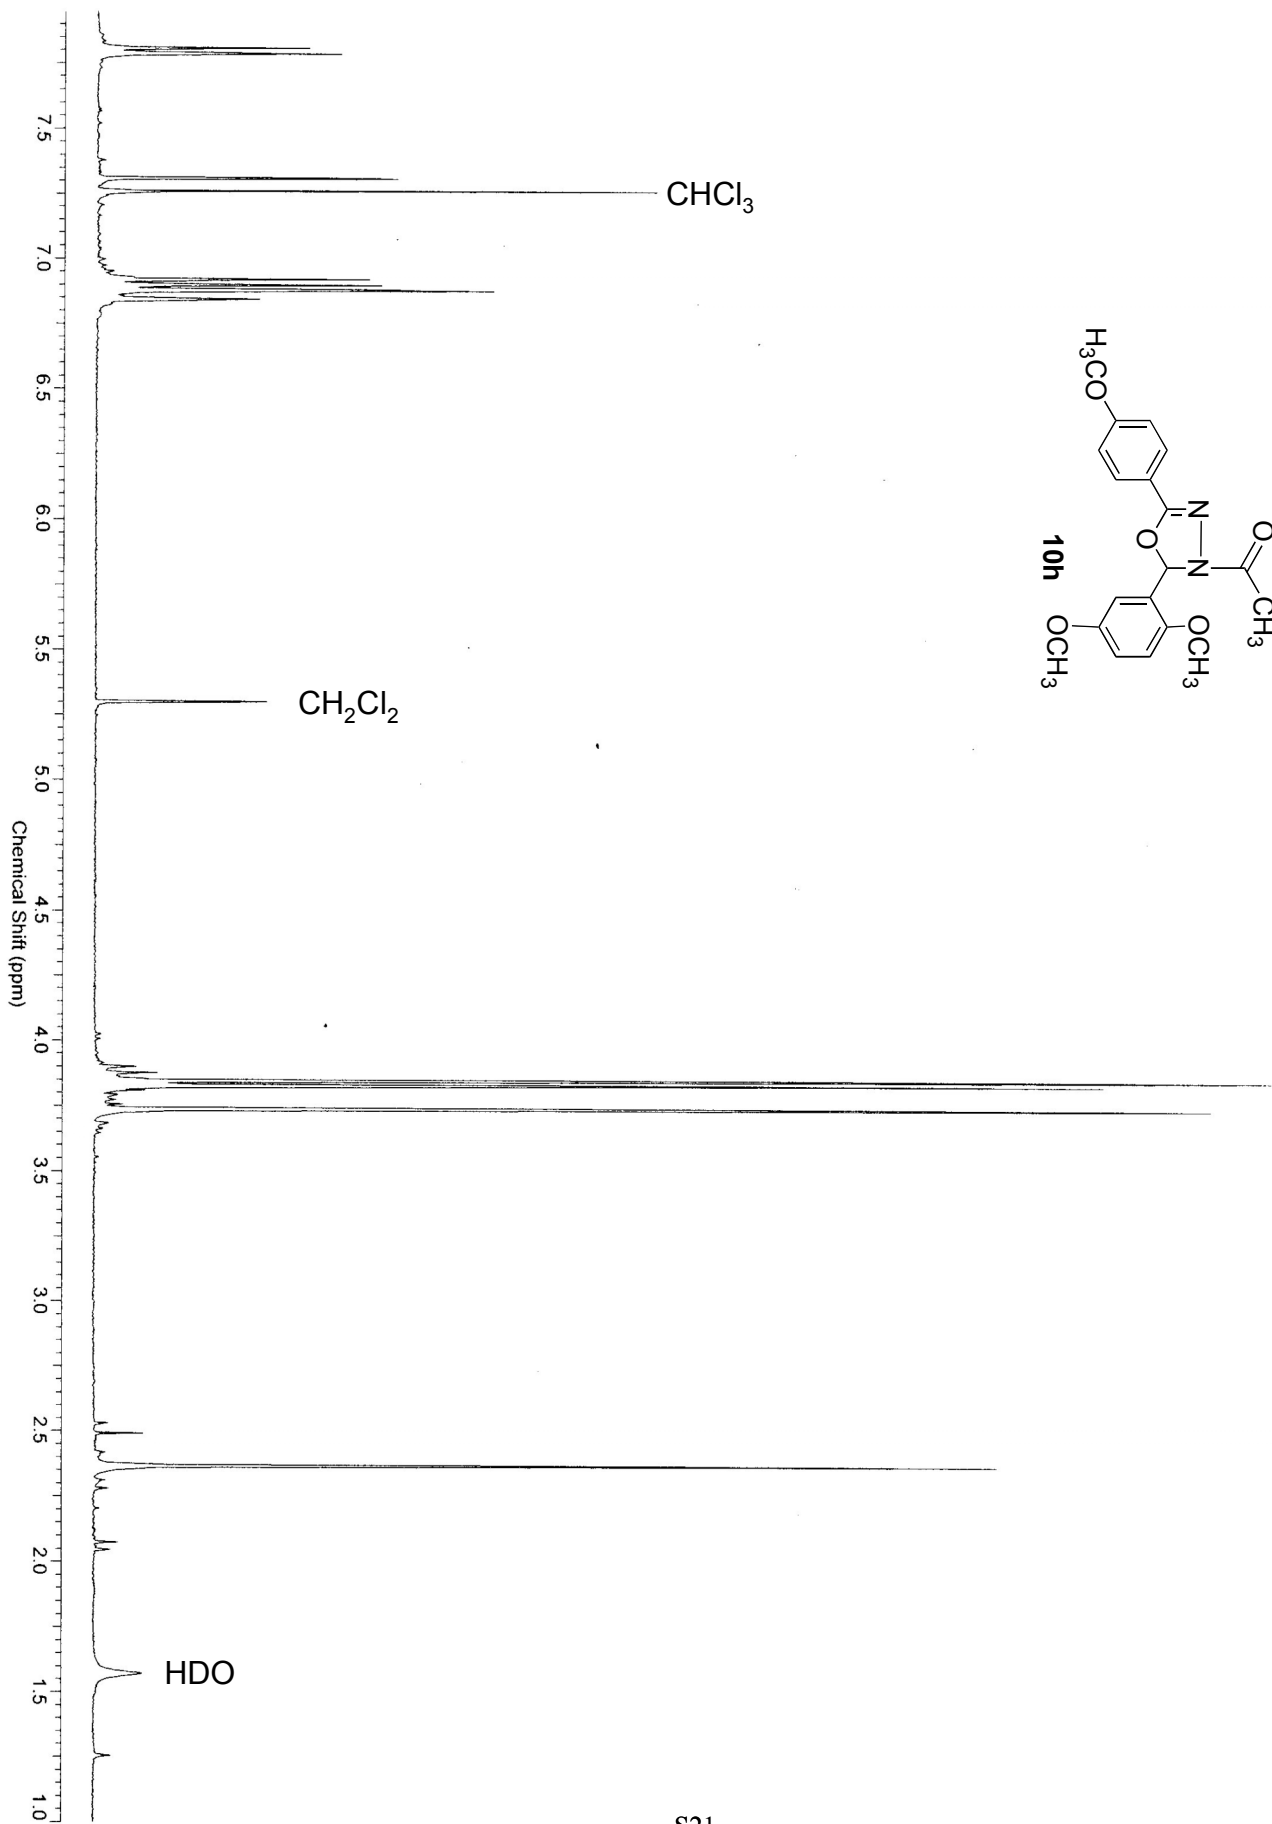

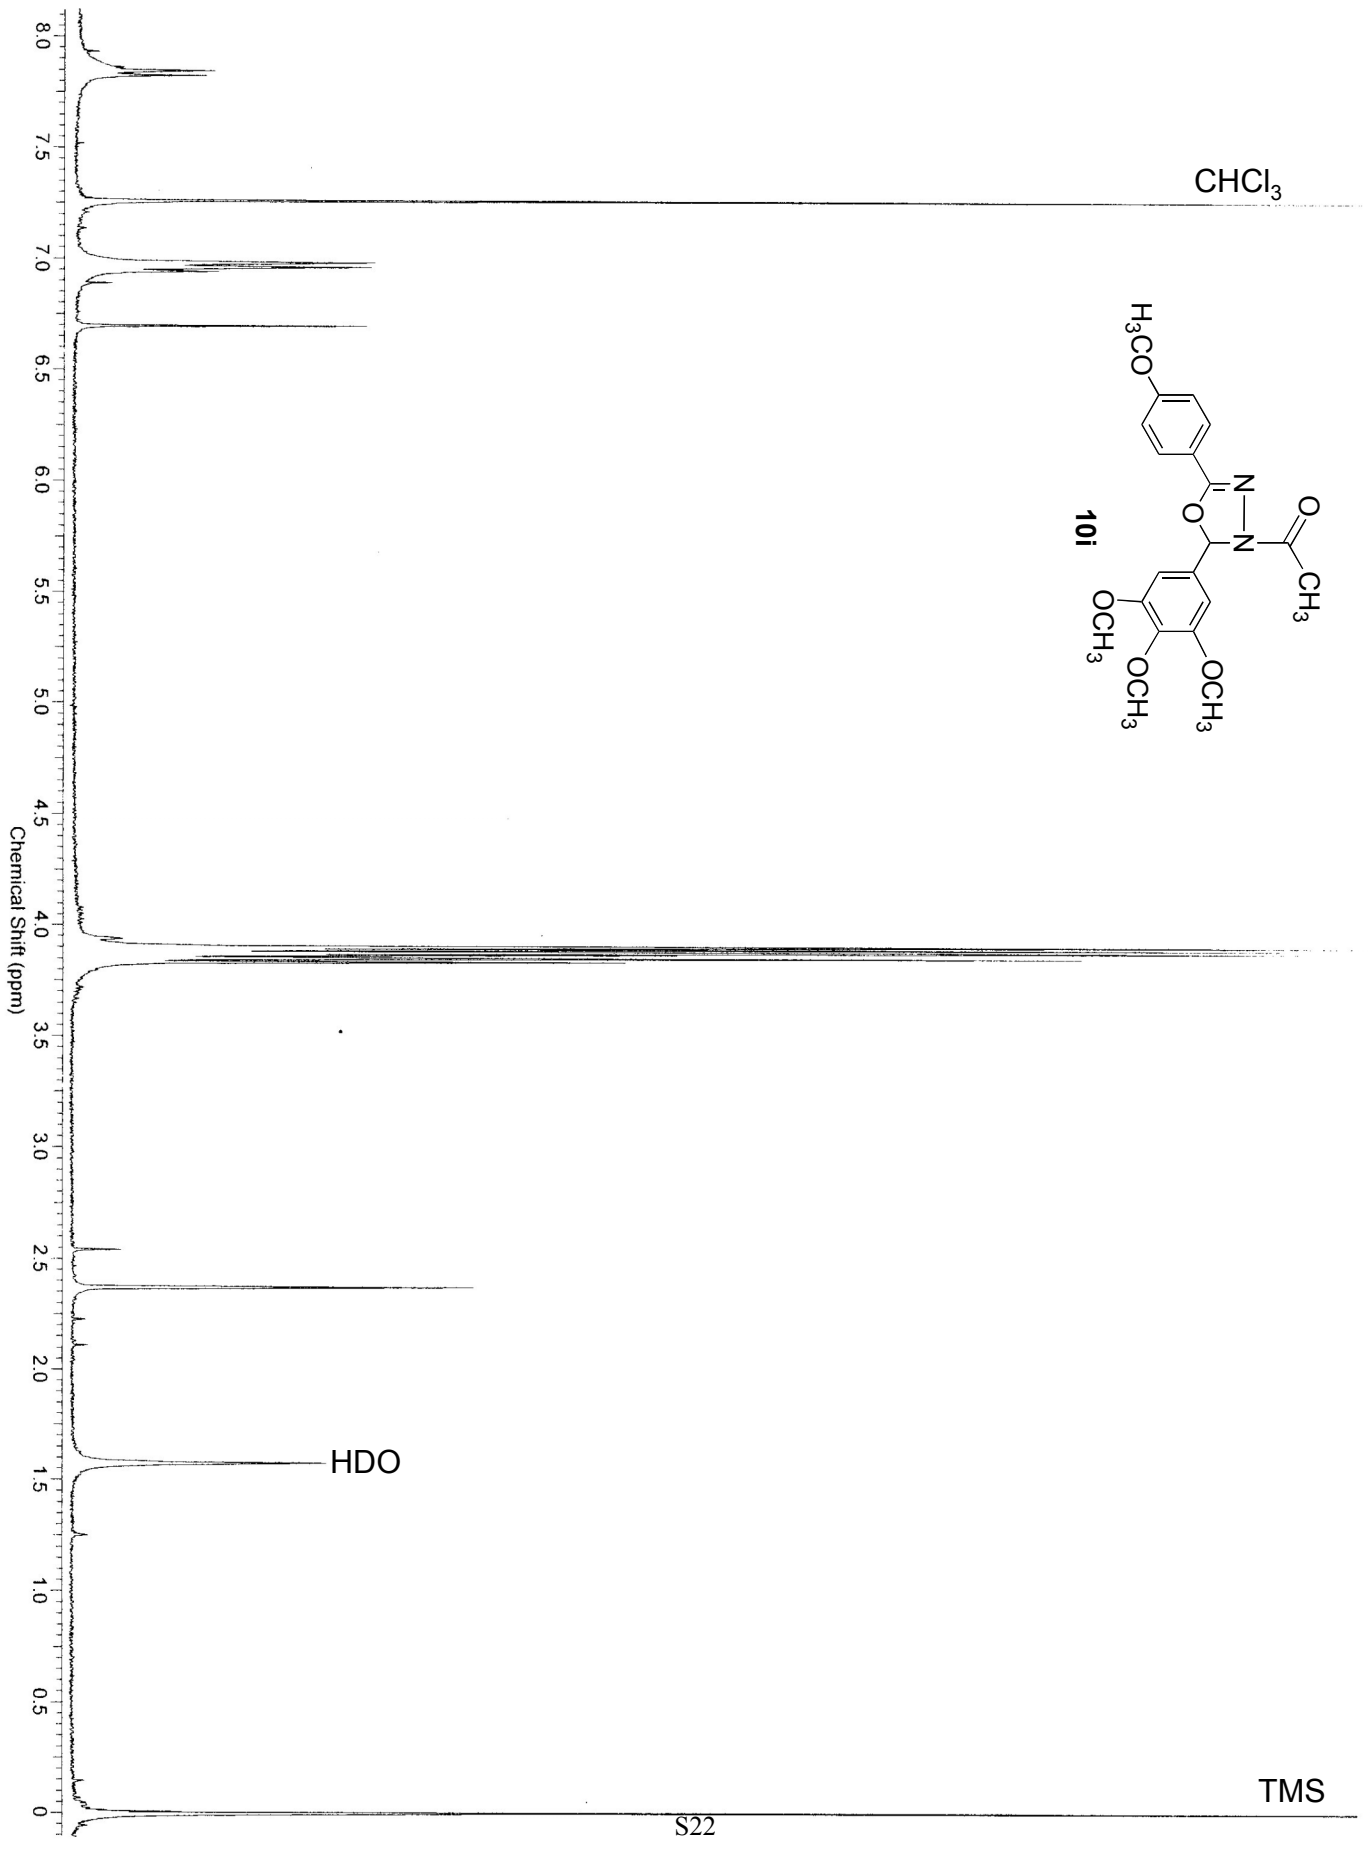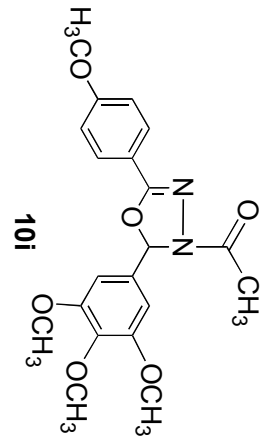

CHCl<sub>3</sub>

TMS

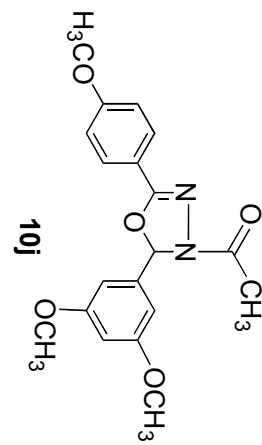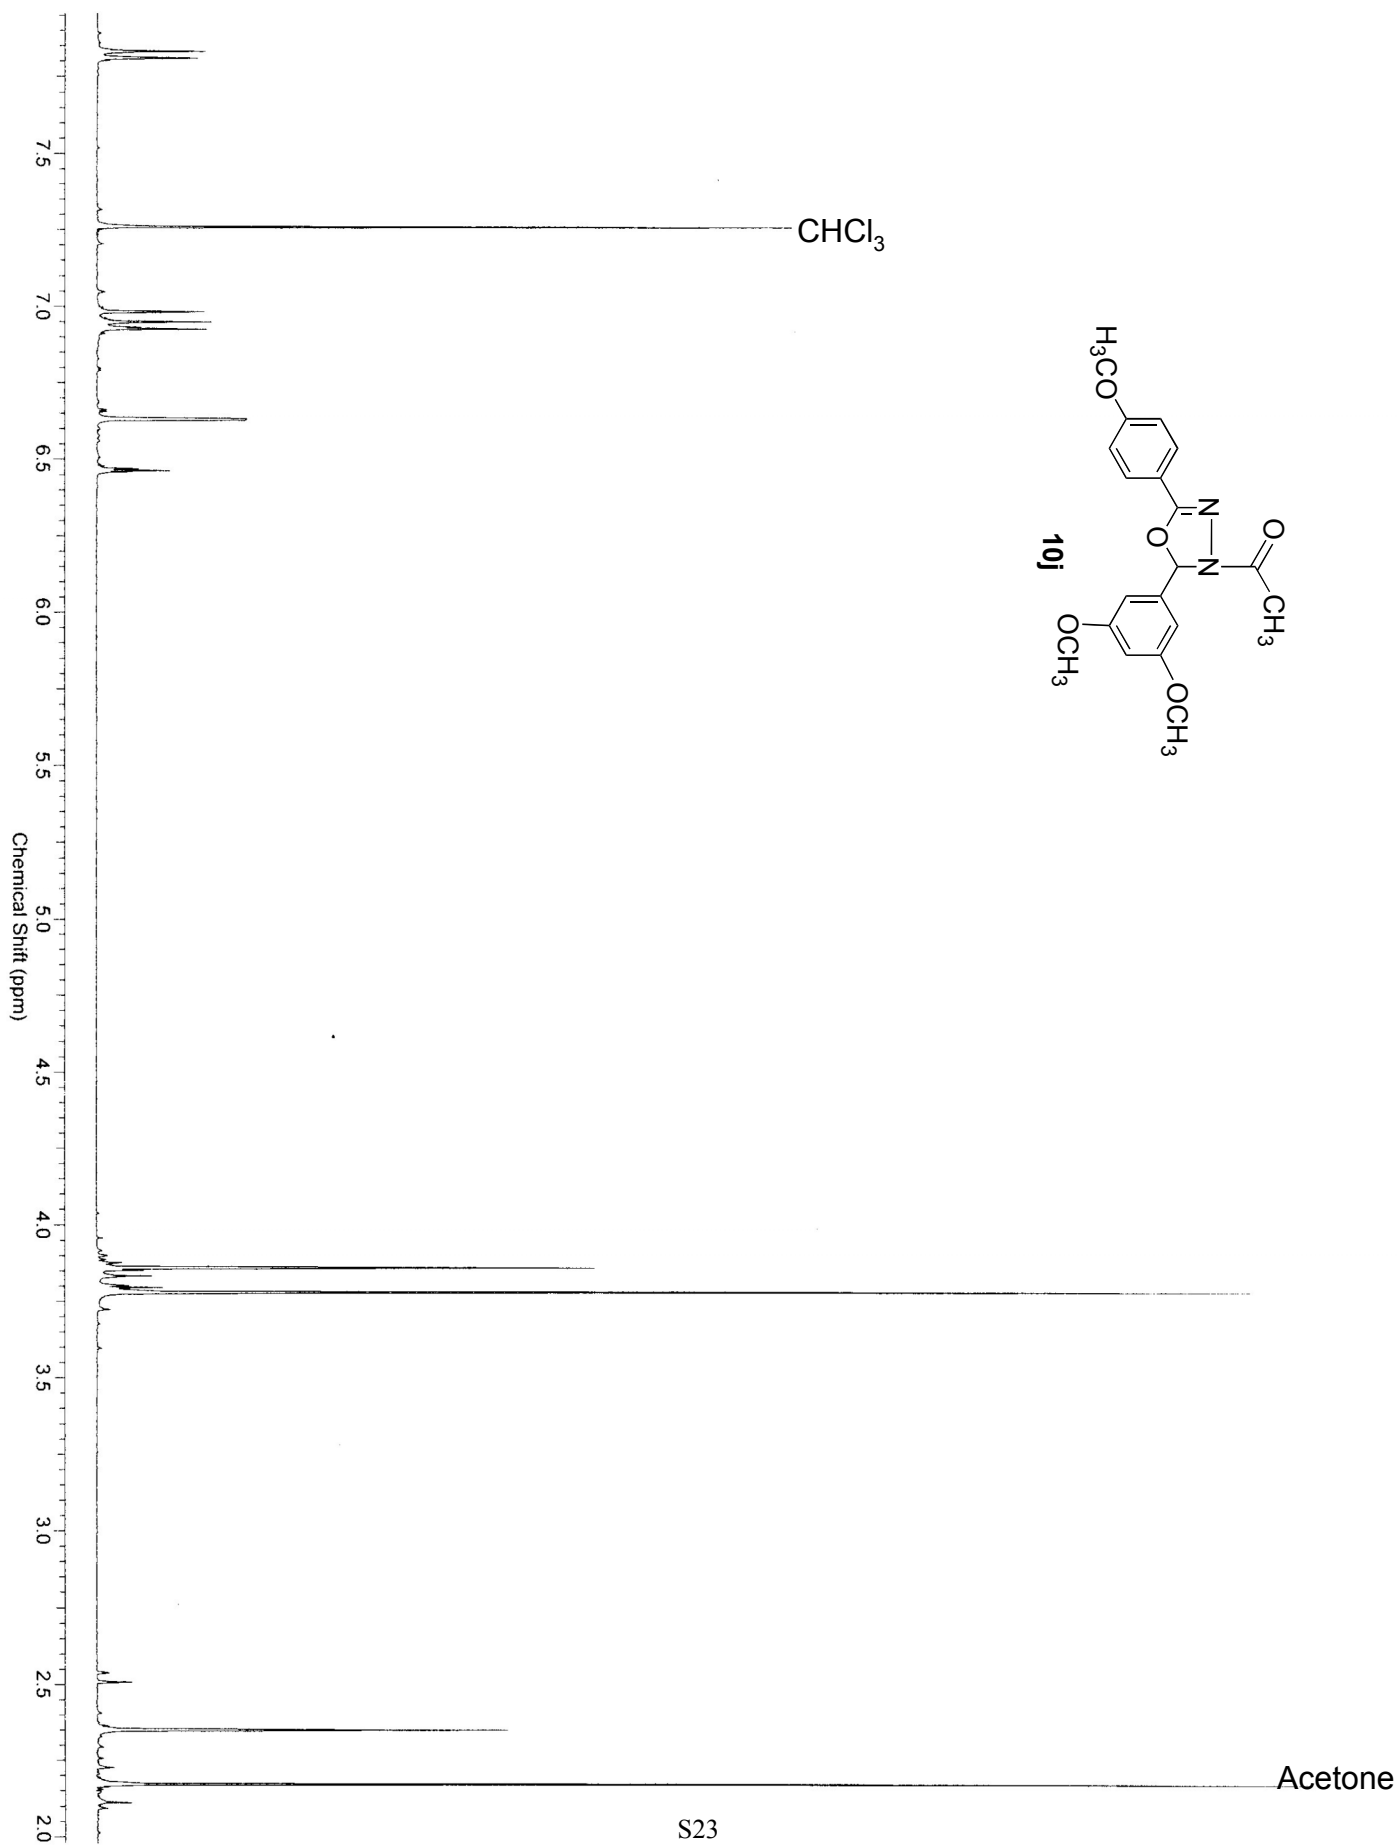

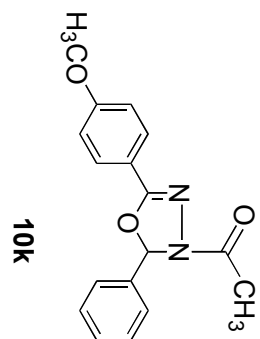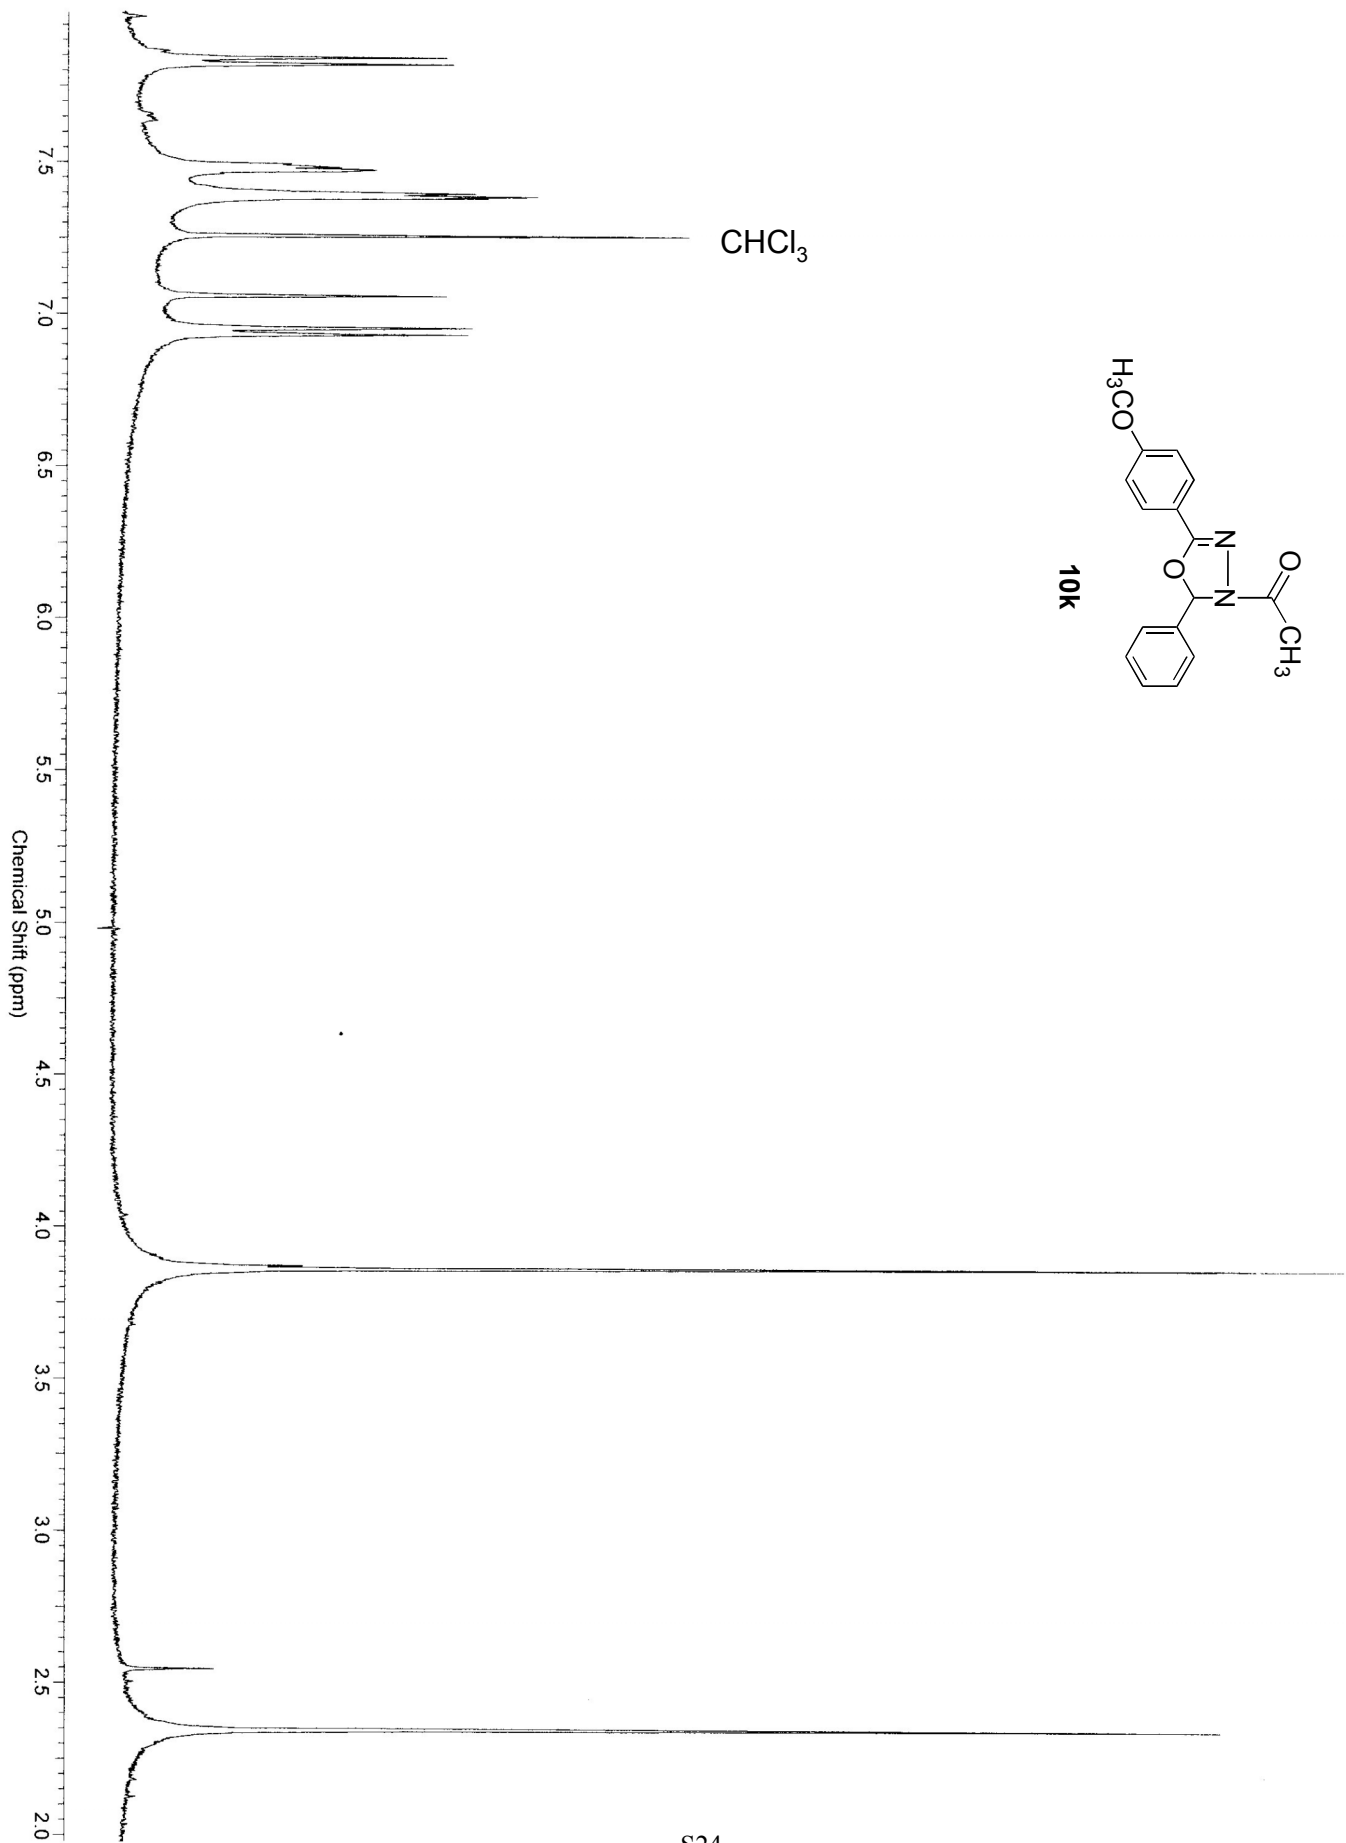



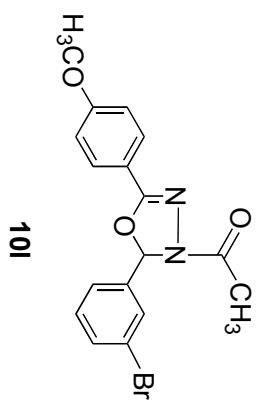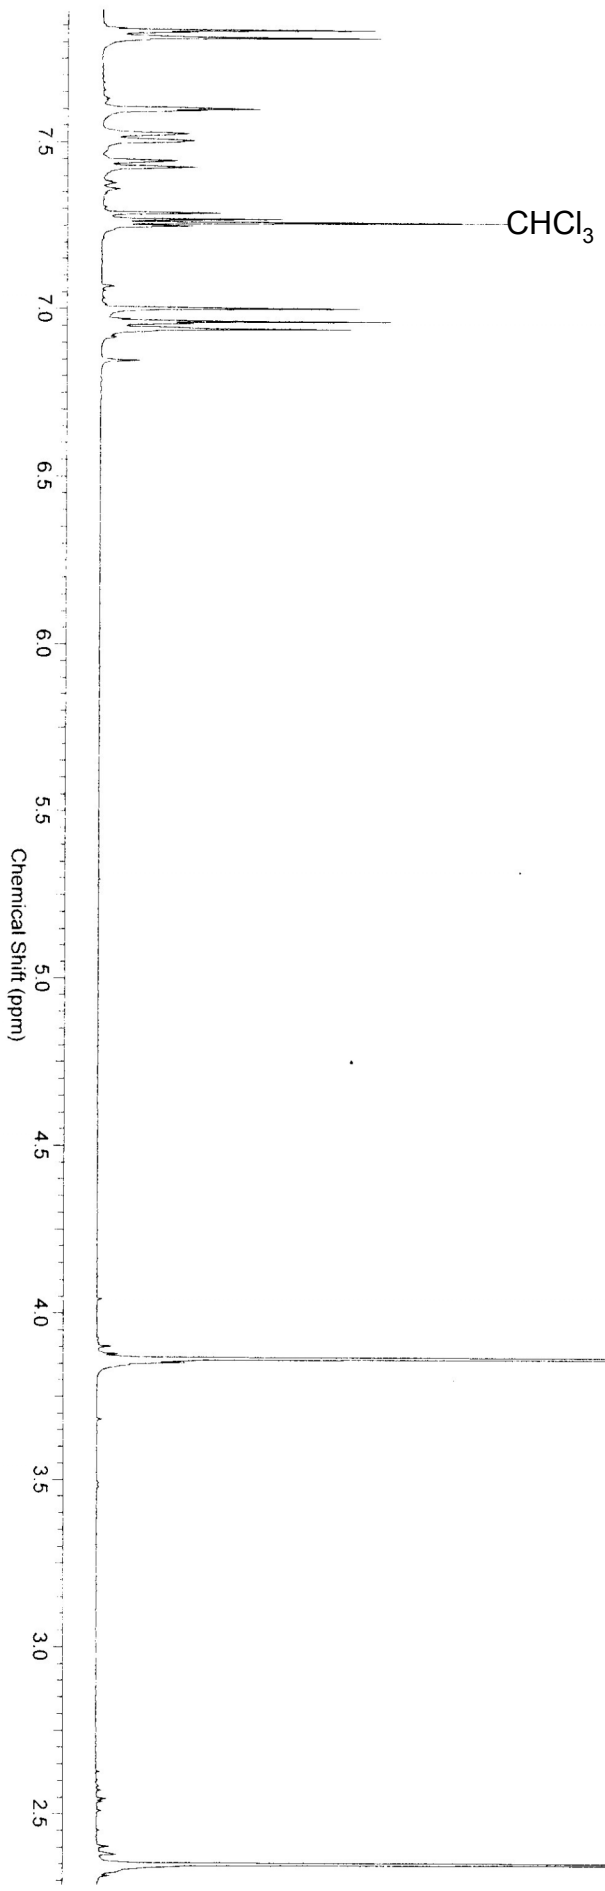

### Results from elemental analysis

| Compounds  | Formula                          | Found |      | Calculated |      |
|------------|----------------------------------|-------|------|------------|------|
|            |                                  | %C    | %H   | %C         | %H   |
| <b>9e</b>  | $C_{22}H_{24}N_2O_8 \cdot H_2O$  | 57.14 | 5.67 | 57.47      | 5.41 |
| <b>9h</b>  | $C_{21}H_{24}N_2O_7$             | 60.57 | 5.81 | 60.28      | 5.76 |
| <b>9l</b>  | $C_{19}H_{19}BrN_2O_5$           | 52.43 | 4.40 | 52.09      | 4.42 |
| <b>10e</b> | $C_{20}H_{20}N_2O_6 \cdot 2H_2O$ | 57.13 | 5.75 | 57.12      | 5.23 |
| <b>10h</b> | $C_{19}H_{20}N_2O_5$             | 64.04 | 5.66 | 63.79      | 5.76 |
| <b>10i</b> | $C_{20}H_{22}N_2O_6$             | 62.17 | 5.74 | 61.83      | 5.79 |

## HPLC Analysis of Compounds 9b, 9c, 9f, 10c, 10d and 10f.

Each compound was dissolved in methanol (1.5 mL). A reversed phase Nova Pak C<sub>18</sub> 3.9 × 150 mm column attached to a Perkin Elmer Series 200 pump coupled to a Hitachi uv-vis detector was used. Each sample was injected at a volume of 5 µL, the solvent was methanol and the flow rate was 0.5 mL/min.

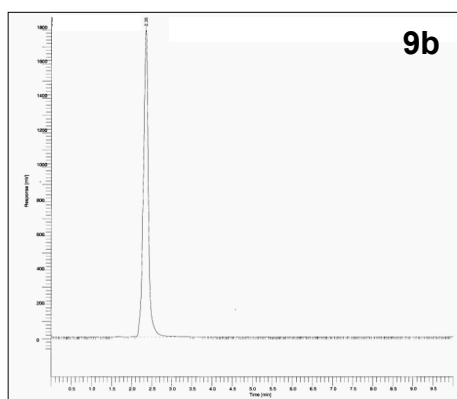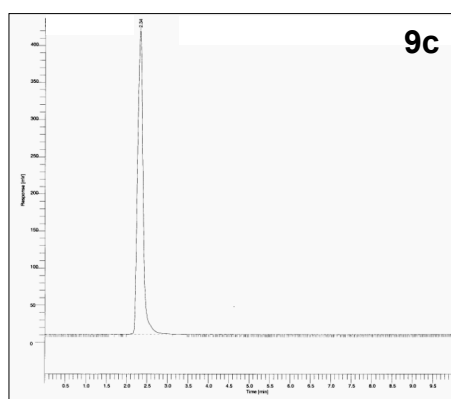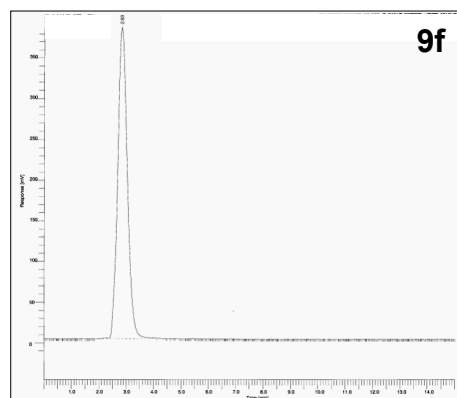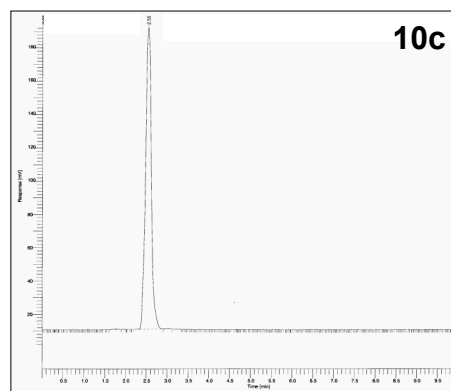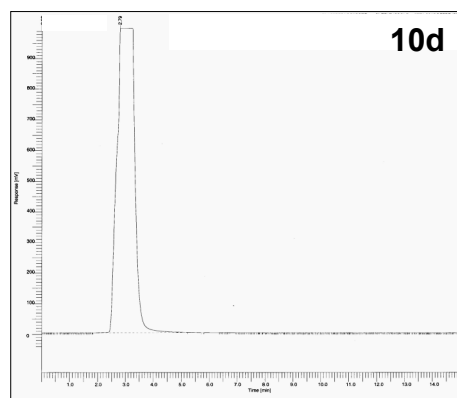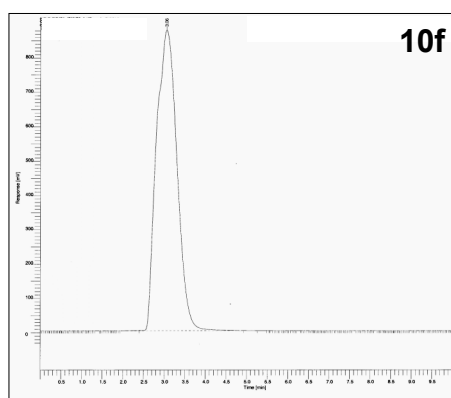

Supplement: NIHMS157967-supplement-1_si_001.pdf [file NIHMS157967-supplement-1_si_001.pdf]
